# Supplementary material
Source: publisher figshare collection journal article supplement (https://sage.figshare.com/ndownloader/files/20141081)
Supplement: Supplementary file 1 [file 20141081]

**Web Appendixes**

**The Differential Effect of Local–Global Identity Among Males and Females:**

**The Case of Price Sensitivity**

Huachao Gao

Vikas Mittal

Yinlong Zhang

**Web Appendix A**

*REVIEW OF SELECT LITERATURE*

*(PRICE SENSITIVITY, LOCAL–GLOBAL IDENTITY, GENDER IDENTITY, AND MULTIPLE IDENTITIES)*

| *Study* | *Sample* | *Product Categories* | *Gender/Gender Identity* | *Local–Global Identity* | *Other Identities* | *Price Sensitivity* | *Key Conclusions* |
| --- | --- | --- | --- | --- | --- | --- | --- |
| *Price Sensitivity Literature* | | | | | | | |
| Huber, Holbrook, and Kahn (1986) | 72 suburban middle-class and 46 urban U.S. students | Peanut butter, pancake syrup, dishwashing liquid, typewriter, 10-speed bicycles, and color television sets | No | No | Brand identity | √ | Consumers display lower price sensitivity when a brand is placed at the upper price-quality boundary of a choice set rather than in the middle when only brand names are provided as opposed to only quality ratings, and when quality information is added to brand name information. |
| Dodds, Monroe, and Grewal (1991) | 585 U.S. students | Calculators and stereo headset players | No | No | No | √ | A higher price is viewed as an indicator of better quality, which increases perceived value and willingness to buy. Alternatively, a higher price is viewed as a greater sacrifice to obtain the product, which decreases perceived value and willingness to buy. |
| Grewal, Monroe, and Krishnan (1998) | 361 U.S. students, 328 U.S. consumers | Bicycle | No | No | No | √ | Both advertised selling price and advertised reference price affect consumers’ willingness to buy and their intention to search for alternatives. Specifically, a higher advertised selling price is perceived as a greater sacrifice, which decreases perceived transaction value and willingness to buy. At the same time, both a higher advertised selling price and reference price increase consumers’ internal reference price, which enhances consumers’ perceived transaction value and increases willingness to pay. |
| Campbell (1999) | 108 U.S. MBA students, 86 U.S. college students and staff | Barbie doll | √ | No | No | √ | Facing a price increase, consumers who view the action as “for-profit” tend to infer a negative motive for the price increase. Consumers then perceive the price increase as unfair, making them less likely to purchase the product. Gender showed no significant effect on price sensitivity. |
| Wakefield and Inman (2003) | IRI secondary data set, 346 U.S. consumers | Functional products such as groceries, household supplies, and gasoline; hedonic products such as sporting events, movie theaters, and dine-in restaurants; frozen pizza | √ | No | No | √ | The effect of household income on price sensitivity is moderated by consumption occasions. Higher household income leads to lower price sensitivity for hedonic (vs. functional) consumption occasions and for social (vs. non-social or individual) settings. As a covariate, females were more price sensitive. |
| Bijmolt, van Heerde, and Pieters (2005) | Meta-analysis based on 81 studies | Durables and groceries | No | No | No | √ | This meta-analysis shows price sensitivity is affected by market characteristics as well as the research methodology used in each study. Specifically, market characteristics include time trend, manufacturer brand versus private label, product category, stage of product life cycle, country, household disposable income, and inflation rate. Research methods include data source, temporal aggregation, stock-keeping unit versus brand level, criterion variable, functional form, price definition, long-term (vs. short-term) price effect, endogeneity of price effect, inclusion of other variables, estimation method, and heterogeneity in price sensitivity. |
| Campbell (2007) | 437 U.S. students | Rug and suit | No | No | No | √ | The source of price increase information moderates the effect of price increase on consumer responses. Consumer responses to price increases are less negative when the information source is nonhuman versus human. The effect is mediated by inferred motive and affect. |
| Chen, Levy, Ray, and Bergen (2008) | Scanner data with 98,691,750 observations |  | No | No | No | √ | Price increases occur more frequently than price decreases, especially for a small price change. This effect holds even after controlling for inflation. |
| Chen et al. (2012) | 120 U.S. consumers, 546 U.S. students | Hand lotion, toothpaste, coffee beans | No | No | No | √ | Consumers tend to neglect the base value associated with percentages in processing price change information. As a result, they tend to prefer quality reduction over price increases, as the former represents a smaller percentage change even though both result in equivalent unit price. |
| Umashankar, Bhagwat, and Kumar (2017) | 700 U.S. consumers | Airline | √ | No | No | √ | Behaviorally loyal consumers tend to show higher price sensitivity by placing more importance on price and less importance on rewards and convenience when making a service purchase decision. In contrast, attitudinally loyal consumers, who experience superior services, tend to show lower price sensitivity. There is significant effect of gender. |
| *Local–Global Identity Literature* | | | | | | | |
| Arnett (2002) | N.A. | N.A. | √ | √ | No | No | This is one of the first papers to propose and define the concept of local–global identity. Through an extensive literature review, it also clarifies how individuals develop either a stronger local identity or a stronger global identity, and that people with a stronger global identity are less likely to hold gender stereotypes. |
| Zhang and Khare (2009) | 462 U.S. students | Global versus local products | **√** | √ | Self-construal | No | Consumers with an accessible local identity tend to prefer local products, whereas consumers with an accessible global identity tend to prefer global products. This effect can be reversed through explicit instruction about accessible identities being nondiagnostic or implicitly by inducing a differentiative (vs. integrative) processing mode. Further, local–global identity has no significant effect on gender identity. |
| Gao, Zhang, and Mittal (2017) | 122 countries, 1,909 Chinese consumers, 1,730 U.S. consumers, 696 U.S. students | Foods in general; rice, milk, organic egg, coffee maker, rug, webcam | No | **√** | No | **√** | Local identity consumers are more willing to make sacrifices to preserve their local cultures, traditions, and ways of living. This activates a sacrifice mindset, which in turn lowers these consumers’ price sensitivity not only for local products but also for products with ambiguous origin. |
| *Gender-Identity Literature* | | | | | | | |
| Gabriel and Gardner (1999) | 414 U.S. students | N.A. | **√** | No | Self-construal | No | Both men and women have a strong desire to belong. Whereas women focus more on relational aspects of interdependence, men focus more on collective aspects of interdependence. Thus, women are more likely to define their self-concept in relational terms such as “I am the youngest daughter in my family,” while men are more likely to define their self-concept in collective terms such as “I am in a fraternity.” Further, women tend to identify more strongly with close social groups, while men tend to identify more strongly with large loose social groups. |
| He, Inman, and Mittal (2008) | 153 records, 355 U.S. students | Jeopardy! game; investment decisions | **√** | No | No | No | Gender affects financial risk taking. For financial decisions mainly driven by the achievement of gains (e.g., stock investments), men are more sensitive to issue capability due to their agentic orientation. In contrast, for financial decisions mainly driven by avoidance of losses (e.g., insurance decisions), women are more sensitive to issue capability due to their communal orientation. |
| Dahl, Sengupta, and Vohs (2009) | 430 Canadian and U.S. students | Watch | **√** | No | No | No | Females and males tend to hold different attitudes toward sex in advertising. Given that females are more committed to close or intimate relationships, they have more negative responses to gratuitous sex in advertisements. This effect does not hold for males, as they are less committed to close relationships and more open to casual sex. |
| Eagly (2009) | N.A. | N.A. | **√** | No | No | No | Though women and men have similar prosocial behavior engagement, they are different in their emphasis on particular classes of these behaviors. Women are prone to relational prosocial behaviors that focus on close relationships. In contrast, men are prone to prosocial behaviors that are more likely to extend even to strangers. |
| Melnyk, van Osselaer, and Bijmolt (2009) | 282 U.S. students, 282 U.S. consumers | Bakery, hairdressing, bike repairing, sports, bartender/waiter (waitress), clothing, medical, legal services, real estate agency, physiotherapy | **√** | No | No | No | Female consumers, given their higher relational interdependence, are more loyal to individuals or small groups that represent close personal relationships. In contrast, male consumers, given their collective interdependence, are more loyal to a group of people or larger groups with relatively loose personal relationships. Females are more loyal to specific service providers who directly communicate with them, whereas males are more loyal to companies that do not necessarily communicate with them directly. |
| Zhang, Feick, and Mittal (2014) | 725 U.S. consumers, 151 U.S. students | Self-reflected | **√** | No | Self-construal, tie strength | No | Females, given their strong communal orientation, are more likely to transmit negative word of mouth (NWOM) to those with whom they have strong social ties, especially when they have low image-impairment concern. In contrast, males, given their agentic orientation, are more likely to transmit NWOM to others when they have low image-impairment concern regardless of the social tie being strong or weak. |
| Meyers-Levy and Loken (2015) | N.A. | N.A. | **√** | No | No | No | The authors provide a comprehensive summary of gender theories and the applications in the marketing literature. They also argue that females favor relational interdependence by forming dyadic relationships with individual entities (e.g., being a friend of Mary). However, males satisfy their belongingness needs via collective interdependence, where their connection involves membership in a larger collective (e.g., being a Cubs fan). |
| *Multiple-Identity Literature* | | | | | | | |
| Winterich, Mittal, and Ross (2009) | 401 U.S. students, 233 U.S. consumers | Monetary donation | **√** | No | Moral identity, in-group vs. out-group | No | For consumers with a female identity, moral identity increases their donations to out-groups but not to in-groups. For consumers with a male identity, moral identity increases donations to in-groups but not to out-groups. |
| Reed et al. (2012) | N.A. | N.A. | **√** | **√** | Many different consumer identities were reviewed in this paper | No | Consumers usually have multiple social identities that are simultaneously salient. This represents a challenge for consumer-identity research, given the complexity of studying multiple identities at the same time.  Consumers are highly motivated to maintain harmony between various identities. When the norms of two salient identities conflict, consumers may resolve the conflict by using a variety of self-regulatory processes. This paper calls for more research on how multiple identities affect consumer decision making. |
| Saint Clair and Forehand (2012) | 424 U.S. students | Salad, lottery, e-reader | No | No | Ideal vs. ought identity, student identity, friend identity, work vs. leisure identity | No | Inter-identity association and competition jointly shape consumers’ responses to identity primes. Priming an identity can counterintuitively lead consumers to approach rather than avoid an alternate identity depending on both association and competition. Specifically, the more two identities are associated, the more consumers approach products targeted at the alternate identity, but only when competition is low. Under high competition, the more two identities are dissociated, the more consumers approach the alternate-identity targeted product. |
| Wang and Cole (2015) | 497 younger U.S. consumers, 397 older U.S. consumers | Mutual fund, MP3 player, toothpaste | No | No | Age identity, expert identity, self-construal | No | Consumers’ age identity and expert identity affect their reliance on benefit versus attribute information in evaluating products. Specifically, younger novices evaluate products more favorably when the descriptions feature benefit information, whereas younger experts evaluate products more favorably when the descriptions feature attribute information. However, both older novices and older experts evaluate products described with benefit information more favorably than those described with attribute information. This paper also calls for more research on how multiple segmentation bases or consumer identities jointly affect consumer decision-making. |
| Hirsh and Kang (2016) | N.A. | N.A. | **√** | No | Many different identities were reviewed in this paper | No | Given the increasing complexity of the social world, individuals are more likely to identify strongly with multiple social groups simultaneously. Identity conflict is defined as when individuals simultaneously identify with groups that adhere to divergent behavioral norms. Identity conflict activates the behavioral inhibition system, which in turn produces high levels of anxiety and stress, depletes individuals’ cognitive resources, and lowers individuals’ well-being. |
| Rabinovich and Morton (2016) | 477 U.S. students | N.A. | **√** | No | Parent identity, employee identity | No | Identify incongruence decreases individuals’ well-being and self-esteem. This effect only holds among individuals who view themselves as stable but is reversed among individuals who view themselves as flexible. |

Notes: N.A. = not applicable

**Web Appendix B**

*PRETEST CONFIRMING THE CONGRUENCE VERSUS INCONGRUENCE BETWEEN GENDER IDENTITY AND LOCAL–GLOBAL IDENTITY*

*Method*

This study was a 2 (local–global identity: local vs. global) × 2 (gender identity: female vs. male) between-subjects design. Participants were 239 U.S. consumers from Amazon Mechanical Turk (MTurk; Mage = 28.22 years of age, SD = 5.91; 85 female). Regarding ethnicity, 66% were Caucasian, 24% were Hispanic, 7% were African American, and 3% were Asian. Of the participants, 41% reported annual household income above $50,000.

*Procedure*. We randomly assigned participants to one of the experimental conditions. They first completed the local–global identity and gender-identity manipulations. The order of the two manipulations was counterbalanced and has no effect on the identity-incongruence measure (F<1). Next, they completed the identity-incongruence scale. Finally, they completed the manipulation checks and provided demographics information.

*Local–global identity manipulation*. The local–global identity manipulation was the same as that used in Study 3 in the main paper (Web Appendix H). To make sure the manipulation was successful, participants completed a manipulation check scale before the demographics. It was the same manipulation check from Study 3, which includes three items: “For the time being, I mainly think:”, “At the moment, I feel that:”, and “On top of my mind right now are thoughts in agreement with saying that:” (1=I am a global citizen, 7=I am a local citizen). We averaged participants’ scores on the three items to form a manipulation check index (α = .91), with higher value indicating stronger local identity.

*Gender-identity manipulation*. Gender identity was manipulated with the same task used in Study 3 of the main paper:

**Male identity**: Some people believe that “making up their own minds about things,” “defending themselves against bullies,” “getting others to do what they want them to do,” “taking charge,” “standing up for themselves,” “taking risks,” and “being brave” are virtuous qualities.

**Female identity**: Some people believe that “showing their emotions,” “sharing things with others in need,” “helping their friends solve their problems,” “making people feel better when their feelings are hurt,” “being polite and showing good manners,” “being kindhearted,” and “expressing concern when others need help” are virtuous qualities.

Participants took a few minutes to think about how the events in their lives embody the qualities described and then wrote a paragraph of approximately 20 words, specifying how they embody the qualities. In the manipulation check, participants indicated how important the following characteristics were to them at that moment: feminine, gentle, sympathetic, tender, and warm (female check items; α = .91); masculine, independent, ambitious, competitive, and analytical (male check items; α = .89). We used the difference score as the gender-identity manipulation check with higher or positive (vs. lower or negative) values indicating stronger female gender identity. The manipulation check was conducted before the demographics and we counterbalanced the order of the local–global identity and gender-identity manipulation checks.

*Identity incongruence scale*. We adapted the identity incongruence scales from Rabinovich and Morton (2016). Specifically, we first asked participants to reflect on their identity as a local versus global citizen, as well as their identity as female versus male. Then, they completed a six-item scale regarding their perceived inner relationship between the two identities. Sample items include “I perceive my identities with these two roles are incongruent with each other” and “Being in one of these roles makes it difficult to be in the other role at the same time” (see Web Appendix J). We averaged the six items to form an identity incongruence index (α = .82), with higher values indicating a stronger sense of identity incongruence.

*Results*

*Manipulation check*. To check the manipulation of local–global identity, we conducted a full-factorial analysis of variance (ANOVA) on the manipulation check index with local–global identity, gender identity, and their interaction as predictors. We also controlled for biological sex, age (F(1, 227) = 12.96, *p* < .004), income, and ethnicity (F(1, 227) = 4.58, *p* < .004). The results indicated that the main effect of local–global identity was significant (F(1, 227) = 8.56, *p* = .004), with those in the local-identity condition reporting a stronger local identity (Mlocal = 4.21 vs. Mglobal = 3.66). Neither the effect of gender identity nor the interaction was significant (Fs < 2.06, *p* > .153). Thus, the manipulation of local–global identity was successful.

We conducted another full-factorial ANOVA on the gender-identity check index. We used gender-identity manipulation, local–global identity, biological sex, and all of their two-way and three-way interactions as independent variables. At the same time, we controlled for biological sex, age, ethnicity, and income. The results indicated the main effect of gender-identity manipulation was significant (F(1, 224) = 5.90, *p* = .002), with those under the female condition indicating a stronger female identity than those under the male condition (Mfemale = .21 vs. Mmale = -.07). The main effect of biological sex was also significant (F(1, 224) = 4.81, *p* = .002), with females reporting female identity as more accessible than males (Mfemale = .16 vs. Mmale = -.09). No other effect was significant (Fs < 2.04, *p* > .154). Thus, the manipulation of gender identity was successful.

*Identity incongruence*. We conducted a full-factorial ANOVA on the identity-incongruence index, with gender identity, local–global identity, and their interaction as predictors. We controlled for biological sex, age, income, and ethnicity. The results indicated that among the control variables, only the effect of age was significant (F(1, 227) = 9.37, *p* = .003). Neither the effect of local–global identity nor the effect of gender identity was significant (Fs < 1). Importantly, their two-way interaction effect was significant (F(1, 227) = 18.38, *p* < .001; see Figure B-1). Under the female-identity condition, those with an accessible global identity reported higher identity incongruence than females with an accessible local identity (Mlocal = 2.63 vs. Mglobal = 3.16; F(1, 227) = 9.17, *p* = .003; d = .58). Thus, among those with female identity, identity incongruence was higher when their global identity was activated and lower when their local identity was activated. Male-identity consumers with an accessible local identity reported higher identity incongruence than those with an accessible global identity (Mlocal = 3.12 vs.Mglobal = 2.58; F(1, 227) = 9.14, *p* = .003; d = .57). The pretest supports the proposed (in)congruence between different levels of gender identity and local–global identity.

Figure B-1

PERCEIVED INCONGRUENCE OF GENDER AND LOCAL–GLOBAL IDENTITY


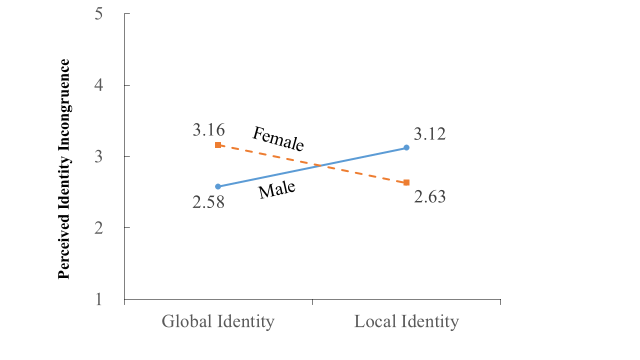


We conducted an additional full-factorial ANOVA on the identity-incongruence index with biological sex, the manipulated local–global identity, and their interaction as independent variables. Age, ethnicity, and income were included as covariates. The results indicated the effects of age (F(1, 228) = 4.39, *p* = .037) and ethnicity (F(5, 228) = 2.58, *p* = .027) were significant. Neither the effect of biological sex nor local–global identity was significant (Fs < 1.14, *p* > .287). Importantly, their interaction effect was significant (F(1, 228) = 12.46, *p* < .001): among females, those with an accessible global identity reported more identity incongruence (Mlocal = 2.68 vs. Mglobal = 2.95; F(1, 228) = 4.51, *p* = .035; d = .31); in contrast, among males, those with an accessible local identity reported more identity incongruence (Mlocal = 3.19 vs. Mglobal = 2.69; F(1, 228) = 8.30, *p* = .004; d = .44).

*Discussion*

Using manipulated gender identity and biological sex, this study empirically validates the key assumption behind our theorizing: female identity and global identity as well as male identity and local identity result in higher identity incongruence than female identity and local identity as well as male identity and global identity.

**Web Appendix C**

*STUDY 2: LOCAL–GLOBAL IDENTITY MANIPULATION OF A RESTAURANT MENU (CONDUCTED IN CHINESE)*

*A: Local Identity Version of the Menu*

**Web Appendix C (CONTINUED)**

*STUDY 2: LOCAL–GLOBAL IDENTITY MANIPULATION OF A RESTAURANT MENU (CONDUCTED IN CHINESE)*

*B: Global Identity Version of the Menu*

**Web Appendix D**

*STUDY 2: THE EFFECTS OF LOCAL–GLOBAL IDENTITY, GENDER, AND TIME PERIOD ON PURCHASE LIKELIHOOD OF ITEMS WHOSE PRICES DID NOT CHANGE*

|  | *Duck Blood Fans* | | *Beef Fans* | | *Rice Noodle* | | *Potato* | | *Yuba* | | *Pungent Beancurd* | |
| --- | --- | --- | --- | --- | --- | --- | --- | --- | --- | --- | --- | --- |
| Intercept | 7.16 (14.57) | | –11.38 (16.79) | | –8.39 (14.17) | | .139 (20.27) | | –2.82 (17.90) | | –7.72 (17.79) | |
| Rain | –.003 (.002) | | –.002 (.002) | | .003 (.002) | | –.002 (.003) | | –.001 (.002) | | .002 (.002) | |
| Temperature | –.002 (.007) | | .003 (.008) | | –.001 (.007) | | –.018† (.009) | | .006 (.009) | | .001 (.008) | |
| CPI | .081 (.14) | | .125 (.161) | | .092 (.136) | | .026 (.18) | | .031 (.172) | | .071 (.193) | |
| Log(sales) | .17 (.16) | | –.046 (.183) | | –.094 (.136) | | –.27 (.195) | | .075 (.195) | | .043 (.21) | |
| Weekend | .071 (.054) | | –.023 (.062) | | –.089† (.052) | | .029 (.075) | | –.020 (.066) | | .108 (.066) | |
| Holiday | –.018 (.080) | | .07 (.093) | | –.047 (.078) | | .099 (.166) | | .023 (.098) | | –.127 (.094) | |
| Local–global | .015 (.024) | | –.032 (.028) | | –.019 (.023) | | .016 (.033) | | –.014 (.029) | | .016 (.028) | |
| Gender | –.12*** (.023) | | .065* (.028) | | .077*** (.023) | | –.017 (.033) | | .027 (.029) | | –.148*** (.028) | |
| Time period | .007 (.036) | | –.002 (.002) | | .007 (.034) | | .071 (.049) | | –.023 (.044) | | .035 (.043) | |
| Local–global × gender | –.034 (.024) | | .02 (.028) | | .006 (.023) | | –.023 (.033) | | .013 (.029) | | .019 (.028) | |
| Local–global × time period | .022 (.024) | | –.032 (.028) | | –.005 (.023) | | –.023 (.033) | | .001 (.029) | | .046 (.028) | |
| Gender × price | .003 (.024) | | .005 (.028) | | –.020 (.023) | | .010 (.033) | | –.017 (.029) | | .024 (.028) | |
| Local–global × gender × time period | .033 (.024) | | .027 (.028) | | –.024 (.023) | | .043 (.033) | | .016 (.029) | | .024 (.028) | |
| Likelihood ratio | 37.15*** | | 14.19 | | 20.45† | | 10.84 | | 2.94 | | 40.15*** | |
|  |  | |  | |  | |  | |  | |  | |
|  | | *Vegetarian Chicken* | | *Rice Cake* | | *Sausage* | | *Gluten* | | *Chiba* | | *Ham* |
| Intercept | | 1.48 (16.60) | | 12.35 (16.75) | | –14.44 (18.69) | | –6.18 (19.08) | | –7.09 (19.78) | | –1.64 (23.81) |
| Rain | | –.002 (.002) | | –.001 (.002) | | –.004 (.002) | | .003 (.003) | | .002 (.003) | | .001 (.003) |
| Temperature | | –.016* (.008) | | –.002 (.008) | | –.001 (.009) | | .003 (.009) | | –.005 (.010) | | –.012 (.011) |
| CPI | | .001 (.16) | | –.089 (.161) | | .137 (.179) | | .107 (.183) | | .076 (.189) | | .028 (.229) |
| Log(sales) | | –.001 (.18) | | –.27 (.184) | | .206 (.203) | | –.404* (.209) | | .100 (.217) | | .092 (.252) |
| Weekend | | –.047 (.061) | | .104† (.063) | | –.022 (.068) | | –.102 (.070) | | –.009 (.073) | | –.135 (.082) |
| Holiday | | –.061 (.091) | | .06 (.093) | | –.139 (.099) | | .002 (.106) | | .068 (.113) | | –.031 (.121) |
| Local–global | | .016 (.027) | | –.027 (.028) | | –.019 (.03) | | .011 (.031) | | .034 (.033) | | .076* (.038) |
| Gender | | .011 (.027) | | .021 (.028) | | –.103*** (.03) | | –.052† (.031) | | .006 (.033) | | .034 (.038) |
| Time period | | .043 (.041) | | –.022 (.041) | | .016 (.045) | | –.039 (.047) | | .001 (.049) | | .127* (.057) |
| Local–global × gender | | –.031 (.027) | | .036 (.028) | | .012 (.03) | | .052† (.031) | | .012 (.033) | | –.013 (.038) |
| Local–global × time period | | .016 (.027) | | –.006 (.028) | | .031 (.03) | | –.033 (.031) | | –.012 (.033) | | –.018 (.038) |
| Gender × price | | .023 (.027) | | –.050 (.028) | | .010 (.03) | | .007 (.031) | | –.010 (.033) | | –.009 (.038) |
| Local–global × gender × time period | | –.022 (.027) | | .016 (.028) | | .022 (.03) | | .049 (.031) | | .020 (.033) | | –.038 (.038) |
| Likelihood ratio | | 11.32 | | 16.17 | | 21.81† | | 19.27 | | 5.95 | | 18.34 |

**Web Appendix D (CONTINUED)**

*STUDY 2: THE EFFECTS OF LOCAL–GLOBAL IDENTITY, GENDER, AND TIME PERIOD ON PURCHASE LIKELIHOOD OF ITEMS WHOSE PRICES DID NOT CHANGE*

|  | *Small Gristle* | | *Bread* | | *Stinky Tofu* | | *Big Ham* | | *Smoked Sausage* | | | *Pork Loin* |
| --- | --- | --- | --- | --- | --- | --- | --- | --- | --- | --- | --- | --- |
| Intercept | 14.67 (20.27) | | 19.61 (25.56) | | 17.65 (20.61) | | –9.13 (20.35) | | –11.28 (22.16) | | | –32.58 (21.87) |
| Rain | .004 (.003) | | –.001 (.003) | | –.003 (.003) | | –.002 (.003) | | –.003 (.003) | | | .003 (.003) |
| Temperature | .002 (.010) | | .007 (.012) | | .005 (.010) | | .019 (.011) | | .001 (.010) | | | .006 (.011) |
| CPI | –.139 (.194) | | –.160 (.245) | | –.179 (.198) | | .105 (.195) | | .103 (.212) | | | .290 (.210) |
| Log(sales) | .088 (.223) | | –.221 (.276) | | .184 (.222) | | –.074 (.222) | | .265 (.243) | | | .519 (.236) |
| Weekend | –.023 (.075) | | .037 (.094) | | .015 (.075) | | .018 (.076) | | .128 (.085) | | | .271** (.085) |
| Holiday | –.027 (.111) | | .012 (.133) | | .188 (.116) | | .130 (.114) | | .104 (.129) | | | .032 (.120) |
| Local–global | –.051 (.033) | | .020 (.040) | | .037 (.032) | | –.108 (.034) | | .012 (.037) | | | .009 (.035) |
| Gender | –.010 (.033) | | –.119** (.040) | | –.362*** (.032) | | .019 (.034) | | –.020 (.037) | | | .005 (.036) |
| Time period | –.021 (.050) | | .020 (.060) | | .010 (.048) | | –.071 (.051) | | –.024 (.055) | | | .029 (.054) |
| Local–global × gender | –.005 (.033) | | –.004 (.040) | | –.030 (.032) | | –.049 (.034) | | –.009 (.037) | | | –.001 (.035) |
| Local–global × time period | .012 (.033) | | .001 (.040) | | .005 (.032) | | –.003 (.034) | | .021 (.037) | | | .004 (.035) |
| Gender × price | –.015 (.033) | | .041 (.040) | | .001 (.032) | | –.032 (.034) | | –.013 (.037) | | | .006 (.035) |
| Local–global × gender × time period | .045 (.033) | | –.001 (.040) | | .012 (.032) | | .011 (.034) | | –.006 (.037) | | | –.021 (.035) |
| Likelihood ratio | 7.13 | | 16.13 | | 140.88*** | | 16.58 | | 5.68 | | | 13.52 |
|  |  | |  | |  | |  | |  | | |  |
|  | | *Chicken Gizzard* | | *Snowflake* | | *Small Fish* | | *Crispy Rice* | | *Corn Chicken* | *Chicken Fillet* | |
| Intercept | | –17.24 (22.26) | | –3.37 (18.95) | | 2.72 (19.61) | | 6.35 (18.29) | | –28.96 (23.14) | –5.82 (22.75) | |
| Rain | | –.001 (.003) | | –.002 (.002) | | .004 (.003) | | –.001 (.002) | | .001 (.003) | –.001 (.003) | |
| Temperature | | .016 (.011) | | –.006 (.009) | | –.004 (.010) | | .003 (.009) | | –.005 (.011) | –.003 (.011) | |
| CPI | | .146 (.214) | | .053 (.182) | | –.011 (.188) | | –.032 (.176) | | .284 (.222) | .071 (.213) | |
| Log(sales) | | .403* (.239) | | –.078 (.205) | | –.028 (.031) | | –.238 (.201) | | .219 (.246) | .026 (.247) | |
| Weekend | | –.017 (.080) | | .135* (.071) | | –.041 (.071) | | –.007 (.068) | | .082 (.084) | .090 (.085) | |
| Holiday | | .061 (.119) | | .084 (.104) | | –.090 (.103) | | –.040 (.100) | | –.001 (.123) | .021 (.124) | |
| Local–global | | –.011 (.036) | | –.017 (.032) | | –.046 (.031) | | –.010 (.030) | | –.012 (.037) | –.021 (.037) | |
| Gender | | –.016 (.036) | | .083** (.032) | | –.097** (.031) | | –.076 (.030) | | .002 (.037) | .036 (.037) | |
| Time period | | –.008 (.054) | | .069 (.047) | | .042 (.047) | | –.044 (.045) | | .095 (.056) | .021 (.056) | |
| Local–global × gender | | –.063 (.036) | | .012 (.032) | | –.027 (.031) | | –.007 (.030) | | .076 (.037) | –.006 (.037) | |
| Local–global × time period | | –.040 (.036) | | –.001 (.032) | | .007 (.031) | | .001 (.030) | | –.034 (.037) | .020 (.037) | |
| Gender × price | | –.024† (.036) | | .025 (.032) | | –.020 (.031) | | .007 (.030) | | –.001 (.037) | –.041 (.037) | |
| Local–global × gender × time period | | .007 (.036) | | .011 (.032) | | –.039 (.031) | | –.030 (.030) | | .010 (.037) | .001 (.037) | |
| Likelihood ratio | | 11.63 | | 16.39 | | 18.60 | | 11.22 | | 10.85 | 4.69 | |

**Web Appendix D (CONTINUED)**

*STUDY 2: THE EFFECTS OF LOCAL–GLOBAL IDENTITY, GENDER, AND TIME PERIOD ON PURCHASE LIKELIHOOD OF ITEMS WHOSE PRICES DID NOT CHANGE*

|  | | *Five Stars* | *Large Meat* | | *Gold Dragon* | | *Fire Dragon* | | *Five Colors* | | | *Squid* |
| --- | --- | --- | --- | --- | --- | --- | --- | --- | --- | --- | --- | --- |
| Intercept | | 17.44 (21.63) | –22.56 (23.31) | | –.998 (25.20) | | –5.51 (23.56) | | 4.25 (26.45) | | | –7.74 (25.14) |
| Rain | | –.001 (.003) | .007† (.004) | | .002 (.004) | | .003 (.004) | | –.004 (.003) | | | –.001 (.003) |
| Temperature | | –.012 (.010) | .009 (.011) | | .006 (.012) | | .021† (.012) | | .005 (.013) | | | –.007 (.012) |
| CPI | | –.171 (.208) | .212 (.224) | | –.099 (.242) | | .045 (.229) | | .002 (.254) | | | .095 (.241) |
| Log(sales) | | .206 (.234) | .262 (.247) | | .399 (.275) | | .227 (.259) | | –.326 (.286) | | | –.014 (.268) |
| Weekend | | –.145* (.077) | .142† (.085) | | .156† (.096) | | .196* (.092) | | –.011 (.096) | | | .005 (.089) |
| Holiday | | –.260* (.107) | –.019† (.113) | | .094 (.142) | | .278* (.142) | | .030 (.139) | | | .096 (.138) |
| Local–global | | –.033 (.035) | –.028 (.036) | | –.041 (.042) | | –.047 (.039) | | .062 (.042) | | | .048 (.038) |
| Gender | | .015 (.035) | –.096** (.036) | | –.032 (.042) | | –.028 (.039) | | –.025 (.042) | | | –.178*** (.038) |
| Time period | | .055 (.052) | .115* (.056) | | .036 (.062) | | –.023 (.058) | | .021 (.064) | | | .082 (.059) |
| Local–global × gender | | .028 (.035) | .054 (.036) | | .044 (.042) | | –.016 (.039) | | .013 (.042) | | | .020 (.038) |
| Local–global × time period | | –.071 (.035) | .014 (.036) | | .014 (.042) | | –.016 (.039) | | .001 (.042) | | | –.012 (.038) |
| Gender × price | | –.039 (.035) | .102** (.036) | | .055 (.042) | | .010 (.039) | | .039 (.042) | | | .015 (.038) |
| Local–global × gender × time period | | –.013 (.035) | –.011 (.036) | | .054 (.042) | | .004 (.039) | | –.008 (.042) | | | –.008 (.038) |
| Likelihood ratio | | 23.46* | 43.73*** | | 12.98 | | 13.57 | | 9.41 | | | 27.51* |
|  | |  |  | |  | |  | |  | | |  |
|  | *Portion Chicken Fillet* | | | *Dried Tofu* | | *Chicken Steak* | | *QQ Loin* | | *Big Gristle* | *Chicken Wing* | |
| Intercept | 30.25 (20.46) | | | 3.91 (17.70) | | 10.42 (20.96) | | 8.56 (20.55) | | 7.73 (20.80) | –21.72 (28.64) | |
| Rain | –.001 (.003) | | | –.001 (.002) | | –.002 (.003) | | .004 (.003) | | .001 (.003) | .003 (.004) | |
| Temperature | –.009 (.010) | | | –.001 (.009) | | .001 (.011) | | .015 (.010) | | .008 (.014) | .003 (.013) | |
| CPI | –.259 (.196) | | | –.026 (.17) | | –.102 (.201) | | –.031 (.197) | | –.050 (.200) | .264 (.276) | |
| Log(sales) | –.270 (.224) | | | –.019 (.192) | | .151 (.230) | | –.509* (.226) | | –.169 (.227) | –.379 (.301) | |
| Weekend | –.120 (.074) | | | .002 (.065) | | .028 (.078) | | –.053 (.076) | | .025 (.077) | –.031 (.100) | |
| Holiday | –.038 (.113) | | | –.045 (.095) | | .082 (.119) | | .002 (.112) | | .065 (.114) | .067 (.149) | |
| Local–global | –.042 (.033) | | | .015 (.029) | | .010 (.034) | | –.083* (.034) | | –.046 (.034) | –.051 (.046) | |
| Gender | –.017 (.033) | | | –.038 (.029) | | –.011 (.035) | | –.006 (.034) | | –.015 (.034) | .050 (.046) | |
| Time period | .016 (.049) | | | .032 (.043) | | –.010 (.051) | | –.086 (.051) | | –.020 (.051) | .076 (.071) | |
| Local–global × gender | –.002 (.033) | | | –.037 (.029) | | –.012 (.034) | | .006 (.034) | | –.043 (.034) | –.007 (.046) | |
| Local–global × time period | .020 (.033) | | | .005 (.029) | | –.001 (.034) | | .029 (.034) | | –.026 (.034) | –.032 (.046) | |
| Gender × price | –.006 (.033) | | | .004 (.029) | | .011 (.034) | | –.045 (.034) | | –.011 (.034) | –.007 (.046) | |
| Local–global × gender × time period | .034 (.033) | | | .023 (.029) | | .021 (.034) | | –.006 (.034) | | –.030 (.034) | –.031 (.046) | |
| Likelihood ratio | 8.70 | | | 6.90 | | 2.71 | | 19.38 | | 6.20 | 10.18 | |

†*p* < .10.

**p* < .05.

***p* < .01.

****p* < .001.

**Web Appendix E**

*STUDY 2: THE ESTIMATED PROBABILITIES OF BUYING DIFFERENT ITEMS BASED ON LOCAL–GLOBAL IDENTITY, GENDER, AND TIME PERIOD (PRICE-NOT-CHANGED ITEMS ONLY)*

| *Gender* | *Female* | | | | *Male* | | | |
| --- | --- | --- | --- | --- | --- | --- | --- | --- |
| *Local–Global Identity* | *Local Identity* | | *Global Identity* | | *Local Identity* | | *Global Identity* | |
| *Time Period* | *Baseline*  *(n=508)* | *Price-Increased*  *(n=573)* | *Baseline*  *(n=501)* | *Price Increased*  *(n=596)* | *Baseline*  *(n=247)* | *Price Increased*  *(n=285)* | *Baseline*  *(n=264)* | *Price Increased*  *(n=286)* |
| Duck blood fans | 33.46% | 34.55% | 30.94% | 30.37% | 41.97% | 38.95% | 39.39% | 44.41% |
| χ2 < 1 | | χ2 < 1 | | χ2 < 1 | | χ2 = 1.42, *p* = .234 | |
| Beef fans | 49.80% | 49.74% | 50.10% | 53.19% | 44.16% | 44.56% | 47.35% | 43.36% |
| χ2 < 1 | | χ2 = 1.04, *p* = .308 | | χ2 < 1 | | χ2 < 1 | |
| Potato | 8.27% | 10.12% | 9.81% | 7.05% | 9.12% | 8.77% | 8.71% | 9.79% |
| χ2 = 1.10, *p* = .294 | | χ2 = 1.68, *p* = .195 | | χ2 < 1 | | χ2 < 1 | |
| Yuba | 12.40% | 13.44% | 14.17% | 13.93% | 13.14% | 11.58% | 12.50% | 12.24% |
| χ2 < 1 | | χ2 < 1 | | χ2 < 1 | | χ2 < 1 | |
| Pungent beancurd | 12.01% | 11.52% | 11.38% | 12.42% | 20.07% | 19.30% | 14.77% | 21.33% |
| χ2 < 1 | | χ2 < 1 | | χ2 < 1 | | χ2 = 3.97, *p* = .046 | |
| Dried tofu | 13.78% | 15.88% | 12.38% | 12.75% | 14.60% | 15.09% | 14.39% | 17.48% |
| χ2 < 1 | | χ2 < 1 | | χ2 < 1 | | χ2 < 1 | |
| Vegetarian chicken | 21.06% | 17.28% | 16.57% | 16.95% | 16.42% | 17.54% | 17.42% | 17.83% |
| χ2 = 2.50, *p* = .114 | | χ2 < 1 | | χ2 < 1 | | χ2 < 1 | |
| Rice cake | 14.76% | 17.45% | 18.96% | 19.63% | 18.61% | 14.74% | 17.80% | 15.03% |
| χ2 = 1.43, *p* = .231 | | χ2 < 1 | | χ2 = 1.51, *p* = .219 | | χ2 < 1 | |
| Sausage | 9.84% | 9.25% | 10.78% | 10.74% | 14.96% | 13.33% | 12.88% | 15.73% |
| χ2 < 1 | | χ2 < 1 | | χ2 < 1 | | χ2 < 1 | |
| Gluten | 8.27% | 9.60% | 12.57% | 8.22% | 13.87% | 11.93% | 10.61% | 10.14% |
| χ2 < 1 | | χ2 = 5.63, *p* = .018 | | χ2 < 1 | | χ2 < 1 | |
| Chiba | 9.25% | 9.60% | 9.58% | 7.89% | 10.58% | 8.77% | 8.71% | 7.69% |
| χ2 < 1 | | χ2 < 1 | | χ2 < 1 | | χ2 < 1 | |
| Ham | 6.30% | 8.20% | 3.99% | 6.52% | 4.74% | 7.42% | 4.55% | 4.90% |
| χ2 = 1.44, *p* = .230 | | χ2 = 3.08, *p* = .079 | | χ2 = 2.11, *p* = .147 | | χ2 < 1 | |
| Chicken steak | 7.48% | 7.68% | 7.58% | 6.54% | 7.66% | 7.37% | 7.20% | 8.04% |
| χ2 < 1 | | χ2 < 1 | | χ2 < 1 | | χ2 < 1 | |
| Small gristle | 6.89% | 8.20% | 9.18% | 8.56% | 8.76% | 6.67% | 8.71% | 10.14% |
| χ2 < 1 | | χ2 < 1 | | χ2 < 1 | | χ2 < 1 | |
| Bread | 3.54% | 4.19% | 3.39% | 3.52% | 5.11% | 7.37% | 4.55% | 7.34% |
| χ2 < 1 | | χ2 < 1 | | χ2 = 1.21, *p* = .270 | | χ2 = 1.90, *p* = .168 | |
| Stinky tofu | 5.31% | 6.28% | 4.19% | 4.70% | 17.52% | 18.60% | 16.29% | 19.23% |
| χ2 < 1 | | χ2 < 1 | | χ2 < 1 | | χ2 < 1 | |
| Big ham | 7.28% | 8.03% | 9.58% | 9.40% | 6.57% | 5.26% | 11.36% | 9.79% |
| χ2 < 1 | | χ2 < 1 | | χ2 < 1 | | χ2 < 1 | |
| Smoked sausage | 6.89% | 5.58% | 5.79% | 5.70% | 7.30% | 5.61% | 6.82% | 5.94% |
| χ2 < 1 | | χ2 < 1 | | χ2 < 1 | | χ2 < 1 | |
| Pork loin | 7.48% | 6.81% | 6.79% | 7.21% | 6.57% | 7.37% | 6.82% | 6.64% |
| χ2 < 1 | | χ2 < 1 | | χ2 < 1 | | χ2 < 1 | |
| QQ loin | 6.89% | 6.63% | 8.38% | 10.23% | 8.39% | 5.96% | 10.23% | 8.74% |
|  | χ2 < 1 | | χ2 < 1 | | χ2 < 1 | | χ2 < 1 | |

**Web Appendix E (CONTINUED)**

*STUDY 2: THE ESTIMATED PROBABILITIES OF BUYING DIFFERENT ITEMS BASED ON LOCAL–GLOBAL IDENTITY, GENDER, AND TIME PERIOD (PRICE-NOT-CHANGED ITEMS ONLY)*

| *Gender* | *Female* | | | | *Male* | | | |
| --- | --- | --- | --- | --- | --- | --- | --- | --- |
| *Local–Global Identity* | *Local Identity* | | *Global Identity* | | *Local Identity* | | *Global Identity* | |
| *Time Period* | *Baseline*  *(n=508)* | *Price-Increased*  *(n=573)* | *Baseline*  *(n=501)* | *Price Increased*  *(n=596)* | *Baseline*  *(n=247)* | *Price Increased*  *(n=285)* | *Baseline*  *(n=264)* | *Price Increased*  *(n=286)* |
| Chicken gizzard | 5.91% | 8.38% | 5.79% | 5.70% | 5.47% | 6.32% | 8.33% | 7.34% |
| χ2 = 2.46, *p* = .117 | | χ2 < 1 | | χ2 < 1 | | χ2 < 1 | |
| Snowflake | 11.42% | 12.57% | 13.17% | 13.26% | 8.36% | 10.18% | 8.33% | 10.84% |
| χ2 < 1 | | χ2 < 1 | | χ2 < 1 | | χ2 < 1 | |
| Small fish | 8.46% | 8.73% | 7.58% | 10.91% | 10.22% | 11.93% | 14.39% | 13.64% |
| χ2 < 1 | | χ2 = 3.53, *p* = .060 | | χ2 < 1 | | χ2 < 1 | |
| Crispy rice | 12.01% | 9.77% | 10.78% | 10.74% | 13.14% | 13.68% | 15.53% | 13.29% |
| χ2 < 1 | | χ2 < 1 | | χ2 < 1 | | χ2 < 1 | |
| Corn chicken | 4.33% | 6.11% | 7.39% | 7.21% | 6.20% | 7.72% | 5.30% | 5.59% |
| χ2 = 1.70, *p* = .192 | | χ2 < 1 | | χ2 < 1 | | χ2 < 1 | |
| Chicken fillet | 5.91% | 6.46% | 5.79% | 7.38% | 5.84% | 4.56% | 6.06% | 5.59% |
| χ2 < 1 | | χ2 = 1.11, *p* = .291 | | χ2 < 1 | | χ2 < 1 | |
| Big gristle | 7.48% | 8.03% | 7.39% | 8.22% | 6.20% | 7.72% | 10.61% | 8.74% |
| χ2 < 1 | | χ2 < 1 | | χ2 < 1 | | χ2 < 1 | |
| Five stars | 4.92% | 8.55% | 7.78% | 8.84% | 5.84% | 8.42% | 7.95% | 5.94% |
| χ2 = 5.56, *p* = .018 | | χ2 < 1 | | χ2 = 1.41, *p* = .236 | | χ2 < 1 | |
| Large meat | 4.72% | 4.71% | 5.99% | 7.05% | 5.47% | 12.28% | 4.92% | 11.54% |
| χ2 < 1 | | χ2 < 1 | | χ2 = 7.95, *p* = .004 | | χ2 = 7.84, *p* = .005 | |
| Gold dragon | 3.54% | 4.01% | 5.99% | 4.87% | 3.65% | 4.21% | 2.65% | 5.59% |
| χ2 < 1 | | χ2 < 1 | | χ2 < 1 | | χ2 = 2.97, *p* = .085 | |
| Fire dragon | 4.33% | 5.03% | 5.39% | 5.20% | 4.38% | 5.26% | 6.06% | 6.64% |
| χ2 < 1 | | χ2 < 1 | | χ2 < 1 | | χ2 < 1 | |
| Five colors | 4.33% | 4.19% | 3.39% | 3.52% | 4.01% | 5.96% | 3.03% | 4.20% |
| χ2 < 1 | | χ2 < 1 | | χ2 = 1.12, *p* = .291 | | χ2 < 1 | |
| Squid | 3.54% | 4.01% | 3.19% | 3.52% | 7.30% | 9.47% | 6.06% | 6.99% |
| χ2 < 1 | | χ2 < 1 | | χ2 < 1 | | χ2 < 1 | |
| Chicken wing | 2.76% | 3.66% | 3.79% | 4.87% | 2.19% | 3.51% | 3.41% | 3.51% |
| χ2 < 1 | | χ2 < 1 | | χ2 < 1 | | χ2 < 1 | |
| Portion chicken fillet | 7.09% | 8.03% | 8.58% | 8.89% | 8.76% | 7.37% | 8.33% | 10.49% |
| χ2 < 1 | | χ2 < 1 | | χ2 < 1 | | χ2 < 1 | |

**Web Appendix F**

*STUDY 2: THE EFFECT OF IDENTITY INCONGRUENCE (VS. CONGRUENCE) ON PURCHASE PROBABILITY: BASELINE VS. PRICE-INCREASED PERIOD*

*A: Chives*

**
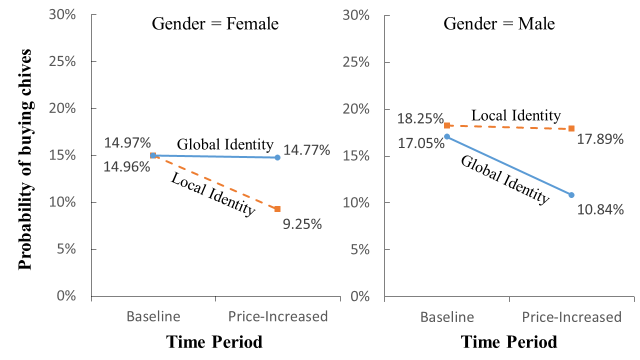
**

*B: Cabbage*


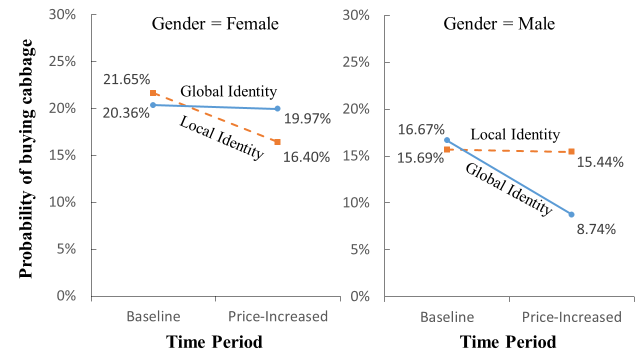


**Web Appendix F (CONTINUED)**

*STUDY 2: THE EFFECT OF IDENTITY INCONGRUENCE (VS. CONGRUENCE) ON PURCHASE PROBABILITY: BASELINE VS. PRICE-INCREASED PERIOD*

*C: Cilantro*


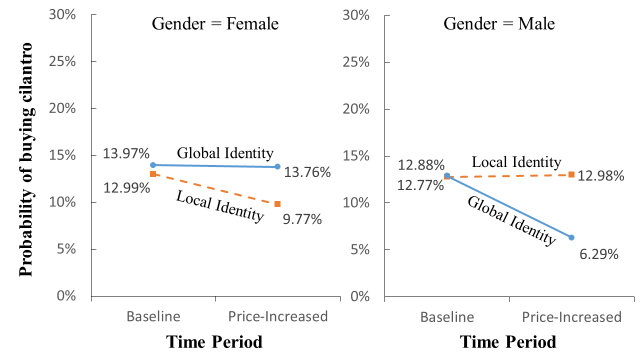


*D: Lotus Root*

*
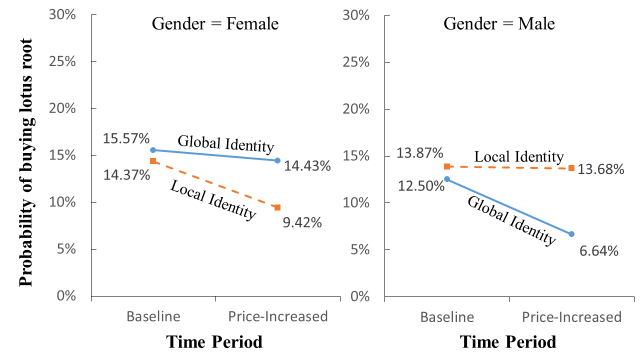
*

**Web Appendix F (CONTINUED)**

*STUDY 2: THE EFFECT OF IDENTITY INCONGRUENCE (VS. CONGRUENCE) ON PURCHASE PROBABILITY: BASELINE VS. PRICE-INCREASED PERIOD*

*E: Needle Mushroom*

**
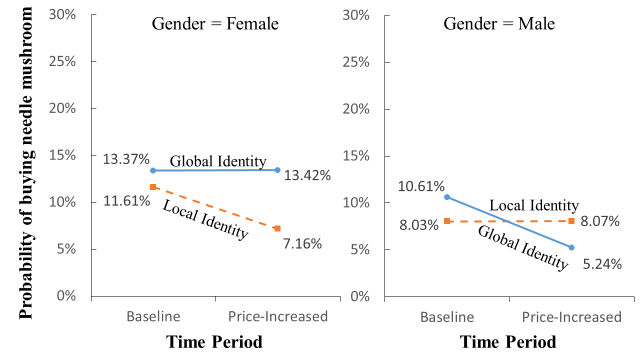
**

*F: Seaweed*

*
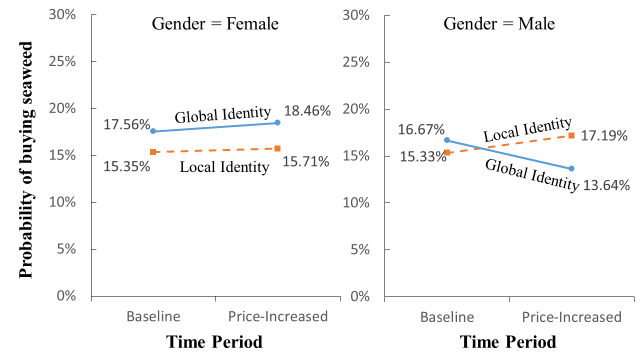
*

**Web Appendix G**

*STUDY 2: ADDITIONAL ANALYSES OF THE FIELD STUDY*

*Method*

In this Web Appendix, we intend to provide additional analyses of Study 2 from the main text. Specifically, we used different models to further test the effect of identity (in)congruence on price sensitivity in the field context with three adjustments: (1) we directly examined the effect of identity incongruence by coding female with global identity and male with local identity as identity incongruence, and female with local identity and male with global identity as identity congruence; (2) we estimated price sensitivity with the regression coefficient of purchase behavior on the actual price of each of the seven focal items; (3) we ran a model combining the seven focal items stacked, and including a dummy variable for items. We also ran separate models for each item.

*Identity (in)congruence*. Following our conceptualization, we generated a new variable of identity incongruence, where 0 represents female with a local identity or male with a global identity, and 1 represents female with a global identity or male with a local identity.

*Price sensitivity*. In line with the previous literature on consumer price sensitivity (Campbell 1999), we measured price sensitivity by comparing choice probability in the baseline vs. the price-increased period. A menu item chosen by consumers was coded as 1 (otherwise 0). Thus, we ascertained price sensitivity through probit regression of consumer choice on time period. As such, a significant negative effect of time period (baseline vs. price-increased) on consumer choice indicates higher price sensitivity. In contrast, a nonsignificant effect indicates lower price sensitivity.

*Results*

According to H1, consumers experiencing identity congruence (female with local identity and male with global identity) should exhibit higher level of price sensitivity than consumers experiencing identity incongruence (female with global identity and male with local identity). As such, we expect significant interaction effect between incongruence and time period on consumer choice. Specifically, under the identity-congruent condition, the effect of time period (baseline=0, price increase = 1) on choice should be negative and significant, indicating relatively higher price sensitivity. In contrast, under the identity-incongruent condition, the effect should be less significant or nonsignificant, indicating relatively lower price sensitivity.

To test this prediction, we conducted a probit regression with consumer choice as the dependent variable, time period as the predictor, and identity incongruence as the moderator. We included all the seven menu items whose prices were increased during the period of our study, as only they can test the price sensitivity. We coded price as 0 (baseline period) vs. 1 (price-increased period). Following Gao, Zhang, and Mittal (2017), we included the specific month’s local Consumer Price Index (CPI), log-10 transformed daily revenue of the restaurant, and whether a specific day represents the weekend (1 = weekend, 0 = weekday) or holiday (1 = holiday, 0 = not a holiday) as covariates. We also included the rain volume and average daily temperature as covariates, as the restaurant owner strongly believes that the business is affected by weather.[[1]](#footnote-1) Lastly, given that we included seven different menu items in the same model, we created six dummy variables as controls to reflect the variances due to menu item differences.

The results indicated that among the control variables, the effects of CPI (b = .18, SE = .06; χ2(1) = 7.71, *p* = .006), time period (b = -.05, SE = .02; χ2(1) = 8.03, *p* = .005), gender (b = .03, SE = .01; χ2(1) = 6.64, *p* = .010), and identity incongruence (b = .07, SE = .01; χ2(1) = 35.82, *p* < .001) were significant. The effects of rain volume, temperature, daily sales revenue, weekend, holiday, and local–global identity were not significant (see table G-1 for details). The results also indicated that different product categories differ, suggesting the need to explore each menu item individually. More importantly, consistent with H1, the interaction effect of time period and identity incongruence was significant (b = -.06, SE = .01; χ2(1) = 30.18, *p* < .001).

To further explore the significant interaction, we conducted follow-up analysis with the MODPROBE syntax (Hayes 2013). The results indicated that under the identity-congruence condition, the effect of time period was negative and significant (b = -.04, SE = .01; t(22,991) = -4.82, *p* < .001), indicating significant price sensitivity. In contrast, under the identity-incongruence condition, the effect of time period was nonsignificant (b = .01, SE = .01; t < 1), indicating relatively lower price sensitivity. Thus, we conclude that during the price-increased period, consumers with incongruent identity are less price sensitive than their identity-congruent counterparts (Figure G-1). The results support H1.

Figure G-1

INTERACTION EFFECT OF TIME PERIOD AND IDENTITY (IN)CONGRUENCE ON OVERALL PURCHASE PROBABILITY

**
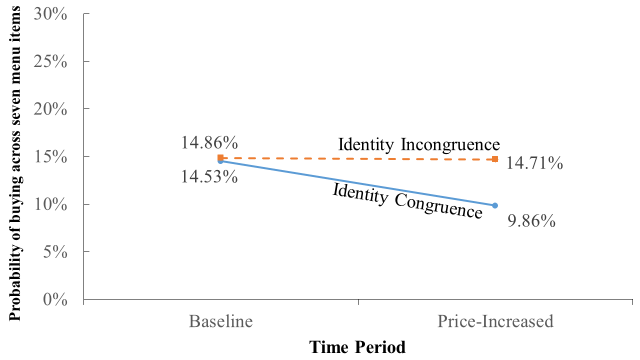
**

Table G-1

STUDY 1: PROBIT MODEL ESTIMATES FOR THE SEVEN FOCAL ITEMS WHOSE PRICES WERE INCREASED

| *Product Item* | *Overall* | *Item1:*  *Pumpkin Cake* | *Item2:*  *Chives* | *Item3:*  *Cabbage* | *Item4:*  *Cilantro* | *Item5:*  *Lotus Root* | *Item6:*  *Needle*  *Mushroom* | *Item7:*  *Seaweed* |
| --- | --- | --- | --- | --- | --- | --- | --- | --- |
| Intercept | -17.25**  (6.68) | -29.26  (18.68) | –27.87 (17.48) | –6.03 (16.42) | –18.68 (18.20) | 8.66 (17.59) | –18.64 (19.13) | –30.08* (17.04) |
| Item1 | .27***(.04) |  |  |  |  |  |  |  |
| Item2 | .09*(.04) |  |  |  |  |  |  |  |
| Item3 | -.05(.04) |  |  |  |  |  |  |  |
| Item4 | .20***(.04) |  |  |  |  |  |  |  |
| Item5 | .016***(.04) |  |  |  |  |  |  |  |
| Item6 | .30***(.04) |  |  |  |  |  |  |  |
| Rain | -.001(.001) | –.001 (.002) | .001 (.002) | .001 (.002) | –.001 (.002) | .001 (.002) | –.001 (.003) | –.003 (.002) |
| Temperature | .003(.003) | .004 (.01) | –.01 (.01) | .001 (.01) | –.01 (.01) | .01 (.01) | .003 (.01) | .02* (.01) |
| CPI | .18**(.06) | .30†(.18) | .030† (.17) | .07 (.16) | .21 (.17) | –.09 (.17) | .22 (.18) | .28 (.16) |
| Log(sales) | .02(.07) | .04(.21) | –.12 (.19) | –.01 (.02) | –.07 (.20) | .17 (.20) | –.27 (.21) | .30 (.18) |
| Weekend | -.02(.03) | .13† (.07) | .01 (.06) | .04 (.06) | –.10 (.07) | .01 (.07) | –.16* (.07) | –.07 (.06) |
| Holiday | .05(.04) | -.03(.11) | .11 (.10) | .02 (.09) | –.02 (.10) | .18† (.11) | .25* (.12) | –.05 (.09) |
| Local–global | -.01(.01) | .02(.03) | .01 (.03) | .02 (.03) | .02 (.03) | .02 (.03) | –.05 (.03) | –.01 (.03) |
| Gender | .03**(.01) | –.06*(.03) | –.05† (.03) | .11*** (.03) | .04 (.03) | .05 (.03) | .10** (.03) | .02 (.03) |
| Time period | -.05**(.02) | –.07(.04) | –.01 (.04) | –.06 (.04) | –.01 (.05) | –.11 (.04) | –.05 (.05) | –.02 (.04) |
| Incongruence | .07***(.01) | .08*(.03) | .08** (.03) | .05† (.03) | –.08 (.03) | .10** (.03) | .06* (.03) | .03 (.03) |
| Time period × Incongruence | -.06***(.01) | –.07*(.03) | -.07*(.03) | –.06*(.03) | .06*(.03) | –.06**(.03) | –.08 (.03) | –.02 (.03) |
| Likelihood ratio | 249.16*** | 31.32** | 33.20** | 30.80** | 22.35* | 29.04** | 44.67*** | 18.85† |

†*p* < .10.

**p* < .05.

***p* < .01.

****p* < .001.

Notes: The values reported in the table represent the estimated coefficients from the corresponding probit model, and the values in parentheses represent the standard errors of the coefficients.

Given the results suggest significant differences among the seven menu items, we also conducted separate probit regressions for each of the seven menu items (table G-1). In these models, we used the actual prices of each item as the predictor since the price differences do reflect price increases. For instance, for Pumpkin Cake, the two price points ¥2 and ¥2.5 reflect a ¥.5 or 25% price increase. Among the seven items, six items showed significant price and identity-incongruence interaction. Given the six significant menu items exhibit similar effect patterns, we only focus on the results of the first item, Pumpkin Cake, to save space. The results for the rest of the menu items are shown in table G-1. Specifically, for Pumpkin Cake, among the main effects, the effects of incongruence (b = .08, SE = .03; χ2(1) = 4.46, *p* = .011) and gender (b = -.06, SE = .03; χ2(1) = 4.25, *p* = .039) were significant. The effect of CPI (b = .30, SE = .18; χ2(1) = 2.73, *p* = .098) and Weekend (b = .13, SE = .07; χ2(1) = 3.32, *p* = .068) were marginally significant. More importantly, the interaction between price and identity incongruence was significant (b = -.07, SE = .03; χ2(1) = 6.14, *p* = .013). Follow-up analyses based on MODPROBE (Hayes 2013) indicated that under identity congruence, the effect of price was negative and significant (b = -.09, SE = .04; t(3,275) = -2.32, *p* = .020); under identity incongruence, the effect of price was nonsignificant (b = .01, SE = .04; t < 1). These results are consistent with H1 (Figure G-2).

Among the seven items that saw a price increase, Seaweed showed no significant effect. We discussed the nonsignificant result for Seaweed with the owner. He indicated that Seaweed tends to have a loyal group of consumers who believe that Seaweed offers benefits for their health and inner-body balance during the hot season (when the data were collected). The owner’s understanding of this matter was corroborated by results that showed a significant and positive effect of temperature on the likelihood to purchase Seaweed (b = .017, SE = .008; χ2(1) = 4.09, *p* = .043).

Figure G-2

INTERACTION EFFECT OF PRICE AND IDENTITY (IN)CONGRUENCE ON PURCHASE PROBABILITY OF THE SEVEN FOCAL ITEMS

*Panel A: Pumpkin Cake*

**
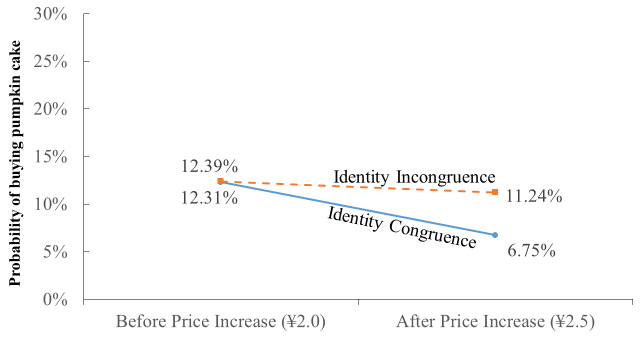
**

*Panel B: Chives*

**
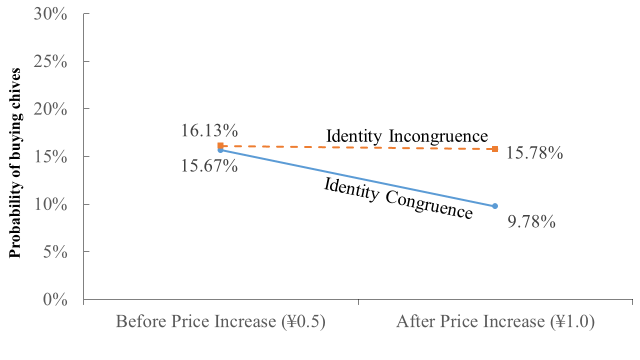
**

*Panel C: Cabbage*

**
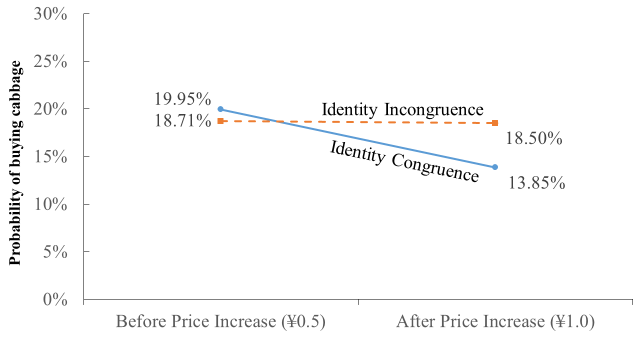
**

*Panel D: Cilantro*

**
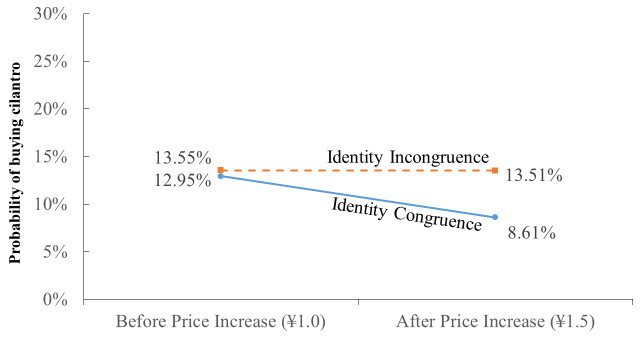
**

*Panel E: Lotus Root*

**
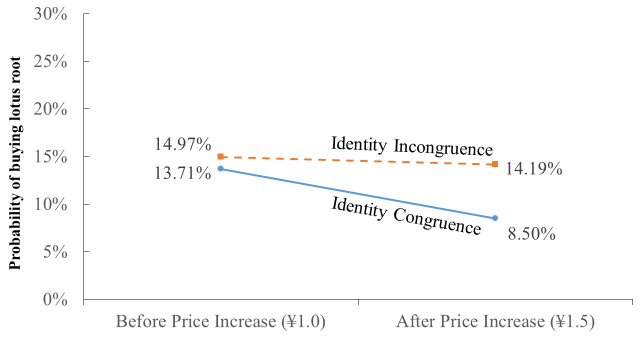
**

*Panel F: Needle Mushroom*

**
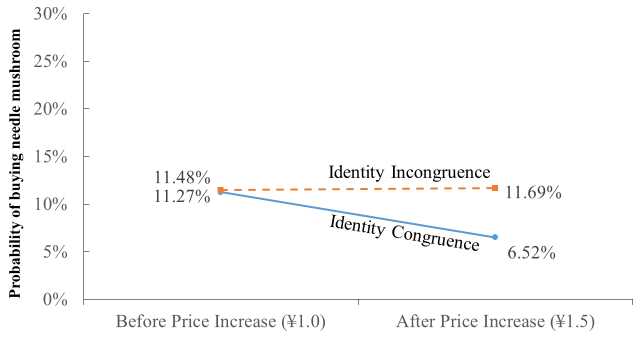
**

*Panel G: Seaweed*

**
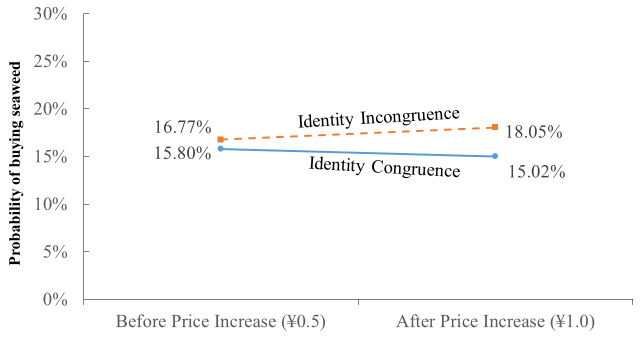
**

*Discussion*

The additional analyses of Study 2 support H1 by showing that identity incongruence on price sensitivities of the focal items hold even we use different estimation models, different coding of the independent variable, and different estimation of price sensitivity. No such effect emerged for the 36 other menu items whose prices did not change, thus enabling us to rule out demand effects as a potential explanation.

**Web Appendix H**

*LOCAL–GLOBAL IDENTITY MANIPULATION AND CHECK*

| ***Movement Advertisement*** *(Studies 3, 4, and 5)* | |
| --- | --- |
| *Local-Identity Condition* | *Global-Identity Condition* |
| 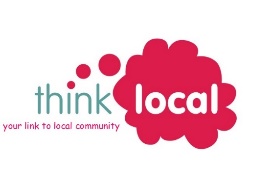**Think Local Movement**    We are promoting the ***think local movement***, which encourages people to take a local perspective on our daily lives. By putting your initials in the box below, you are showing support for our ***think local movement***.  Specifically, ***think local*** means you identify with the following behaviors:   - You belong to the local community - You are a local citizen - You always think locally - You hold a local viewpoint - You respect your local traditions - You care about knowing local events - Your heart belongs to your local community   Our ***think local movement*** needs your support! Simply by putting your initials in the following box, you indicate you are supporting our ***think local movement***. Your support means everything to us. Thank you! | 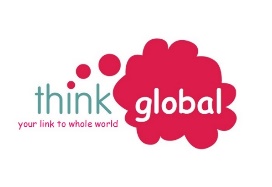**Think Global Movement**  We are promoting the ***think global movement***, which encourages people to take a global perspective on our daily lives. By putting your initials in the box below, you are showing support for our ***think global movement***.  Specifically, ***think global*** means you identify with the following behaviors:   - You belong to the whole world - You are a global citizen - You always think globally - You hold a global viewpoint - You care about knowing global events - Your heart belongs to the whole world - You believe you are connected with the rest of the world   Our ***think global movement*** needs your support! Simply by putting your initials in the following box, you indicate you are supporting our ***think global movement***. Your support means everything to us. Thank you! |
| ***Local–Global Identity Manipulation Check:*** | |

- For the time being, I mainly think…
- At this moment, I feel that…
- On top of my mind right now are thoughts in agreement with saying that…

1 = “I am a global citizen,” 7 = “I am a local citizen”

**Web Appendix I**

*STUDIES 3 AND 5: THE HEADPHONES SCENARIO*

Suppose you have been planning to buy new headphones for a while. Last week, you found a pair of **USonic** headphones (see picture below) priced at **$89.99** in an electronic store. You tried them on and found they suit you very well. Today, you finally decided to go to the electronics store to make the final purchase and bring the headphones home with you. However, you found the price of the headphones is now **$95.99**.

**Web Appendix J**

*SCALES USED FOR MEASURING KEY CONSTRUCTS*

| ***Identity-Incongruence Scale*** *(Rabinovich and Morton 2016; 1 = “strongly disagree,” 7 = “strongly agree;” pretest-Web Appendix B)* | *Alpha* |
| --- | --- |
| I perceive my identities with these two roles are consistent with each other. (R) | .82 |
| I perceive my identities with these two roles are at incongruence with each other. |
| Being in one of these roles makes it difficult to be in the other role at the same time. |
| Being in one of these roles makes it very easy to be in the other role at the same time. (R) |
| The way I am behaving when I am in one of these roles is very different from the way I am behaving when I am in the other role. |
| The way I am behaving when I am in one of these roles is very similar to the way I am behaving when I am in the other role. (R) |
| ***Purchase Intention After Price Increase or Price Sensitivity*** *(Grewal, Monroe, and Krishnan 1998; 1 = “very low,” and 7 = “very high”; Studies 3, 4, and 5)* |  |
| If I were going to buying a [product], the probability of buying this [product] at the current price is … | .96(S3)  .97(S4)  .97(S5) |
| The likelihood that I would purchase this [product] at the current price is ... |
| The probability that I would consider buying this [product] at the current price is ... |
| At the current price, the likelihood that I would seriously consider buying this [product] is ... |
| The probability that I am willing to buy this [product] at the current price is ... |
| ***Sacrifice Mindset*** *(Gao, Zhang, and Mittal 2017; 1 = “strongly disagree,” and 7 = “strongly agree”; Study 3)* |  |
| I believe sacrifice is a great virtue. | .92 |
| I am willing to give up my personal benefits for a bigger cause. |
| Sacrificing is important and seems easy at the moment. |
| I feel the need to give up things I like doing. |
| I feel the urge to make the necessary sacrifice. |
| Sacrifices are necessary to achieve long-term goals for oneself and for society. |
| I am willing to forgo desired activities for something more important. |
| ***Local–Global Identity Scale*** (*Tu, Khare, and Zhang 2012; 1 = “strongly disagree,” and 7 = “strongly agree”; Web Appendixes K and Q)* |  |
| My heart mostly belongs to my local community (local identity).  I respect my local traditions (local identity).  I identify that I am a local citizen (local identity).  I care about knowing local events (local identity). | .76 |
| My heart mostly belongs to the whole world (global identity).  I believe people should be made more aware of how connected we are to the rest of the world (global identity).  I identify that I am a global citizen (global identity).  I care about knowing global events (global identity). |

**Web Appendix J - CONTINUED**

*SCALES USED FOR MEASURING KEY CONSTRUCTS*

| ***Gender Identity Scale*** *(Bem 1974; 1 = “always untrue,” 7 = “always true;” Study 5)* | | *Alpha* |
| --- | --- | --- |
| Please indicate to what extent the following statements/characteristics describe who you are:  20 female identity items: | | .92 |
| Affectionate  Cheerful  Childlike  Compassionate  Does not use harsh language  Eager to soothe hurt feelings  Feminine  Flatterable  Gentle  Gullible | Loves children  Loyal  Sensitive to the needs of others  Shy  Soft spoken  Sympathetic  Tender  Understanding  Warm  Yielding |
| 20 male identity items: | |
|  | |  |
| Acts as a leader  Aggressive  Ambitious  Analytical  Assertive  Athletic  Competitive  Defends own beliefs  Dominant  Forceful | Has leadership abilities  Independent  Individualistic  Makes decisions easily  Masculine  Self-reliant  Self-sufficient  Strong personality  Willing to take a stand  Willing to take risks | .93 |

**Web Appendix K**

*DISCRIMINANT VALIDITY AMONG THE KEY CONSTRUCTS*

*Discriminant Validity Between Local–Global Identity and a Sacrifice Mindset*

We conducted a separate study with 406 U.S. consumers recruited from MTurk. Their ages ranged from 19 to 69 years (Mage = 34.16 years, SD = 10.70), 42% were females, and 45% reported an annual household income above $50,000. The participants completed the local–global scale and the sacrifice mindset scale. We counterbalanced the order of the measures. Then, participants provided demographic information.

The local–global identity scale was developed by Tu, Khare, and Zhang (2012) as reported in Web Appendix J. It has a four-item local-identity subscale (α = .83)–“I identify that I am a local citizen,” “I care about knowing local events,” “My heart mostly belongs to my local community,” and “I respect my local traditions”–and a four-item global-identity subscale (α = .84)–“I identify that I am a global citizen,” “I care about knowing global events,” “My heart mostly belongs to the whole world,” and “I believe people should be made more aware of how connected we are to the rest of the world.” We measured sacrifice mindset with a seven-item scale (α = .90) adapted from Gao, Zhang, and Mittal (2017), which we also used in Study 3 of the main paper (Web Appendix J).

Then, we conducted a confirmatory factor analysis (CFA) with MPlus 7. We specified a three-factor model with the four local-identity statements as indicators of the local-identity construct, four global-identity statements as indicators of the global-identity construct, and seven sacrifice-mindset statements as indicators of the sacrifice-mindset construct. The CFA model shows a good fit with the data (χ2 = 22.75, *p* < .001; root mean square error of approximation [RMSEA] = .065; comparative fit index [CFI] = .95; standardized root mean square residual [SRMR] = .039). The standardized factor loadings and the corresponding standard errors appear in Table K-1.

Table K-1

LOCAL IDENTITY, GLOBAL IDENTITY, AND SACRIFICE MINDSET: FACTOR LOADINGS AND CORRESPONDING STANDARD ERRORS

| *Construct* | *Items* | *Loading* | *SE* |
| --- | --- | --- | --- |
| Local  identity | I identify that I am a local citizen. | .73 | .062 |
| I care about knowing local events. | .67 | .055 |
| My heart mostly belongs to my local community. | .77 | .065 |
| I respect my local traditions. | .76 | .059 |
| Global  identity | I identify that I am a global citizen. | .81 | .030 |
| I care about knowing global events. | .59 | .033 |
| My heart mostly belongs to the whole world. | .80 | .027 |
| I believe people should be made more aware of how connected we are to the rest of the world. | .73 | .028 |
| Sacrifice mindset | I believe sacrifice is a great virtue. | .68 | .031 |
| I am willing to give up my personal benefits for a bigger cause. | .76 | .026 |
| Sacrificing is important and seems easy at the moment. | .73 | .028 |
| I feel the need to give up things I like doing. | .75 | .026 |
| I feel the urge to make the necessary sacrifice. | .75 | .026 |
| Sacrifices are necessary to achieve long-term goals for oneself and for society. | .78 | .024 |
| I am willing to forgo desired activities for something more important. | .75 | .026 |

Table K-2

CORRELATIONS AND AVERAGE EXTRACTED VARIANCES FOR LOCAL IDENTITY, GLOBAL IDENTITY, AND SACRIFICE MINDSET

| *Constructs* | *Reliability* | *(1)* | *(2)* | *(3)* |
| --- | --- | --- | --- | --- |
| 1. Local identity | .83 | .95 |  |  |
| 2. Global identity | .84 | .21*** | .97 |  |
| 3. Sacrifice mindset | .90 | .54*** | .36*** | .98 |

Notes: *** = p<.001; The square root of the average variance extracted is on the diagonal of each matrix; the inter-construct correlation is off the diagonal.

Table K-2 also shows the discriminant validity, where both the correlations among the different constructs as well as the average variance extracted (AVE) for each construct are reported. Following Fornell and Larcker (1981), the square root of the AVE values are significantly larger than the corresponding correlations, suggesting strong discriminant validity.

We conducted competing model analyses to further test the discriminant validity. In the first model, we treated all three factors as one single construct (χ2 = 1254.09, *p* < .001; RMSEA = .178; CFI = .610; SRMR = .133). In the second model, we treated local identity and sacrifice mindset as one factor and global identity as a second factor (χ2 = 708.61, *p* < .001; RMSEA = .131; CFI = .792; SRMR = .087). In the third model, we treated global identity and sacrifice mindset as one factor and local identity as a second factor (χ2 = 879.32, *p* < .001; RMSEA = .148; CFI = .735; SRMR = .111). Taken together, these establish discriminant validity between local–global identity and sacrifice mindset.

*Discriminant Validity Between Sacrifice Mindset and Price Sensitivity*

We conducted another CFA with the data from Study 3 of the main paper. Specifically, in Study 3, we measured sacrifice mindset with a seven-item scale from Gao, Zhang, and Mittal (2017) and price sensitivity with a five-item scale from Grewal, Monroe, and Krishnan (1998; for detailed descriptions see Table K-3 and Web Appendix J). Participants were 335 U.S. consumers recruited via MTurk. The average age was 34.99 years (SD = 11.70 years), 152 were female, and 48% reported an annual income above $50,000.

The results from the CFA indicated that treating sacrifice mindset and price sensitivity as two separate constructs resulted in significantly better model fit (χ2 = 96.10, *p* < .001; RMSEA = .049; CFI = .993; SRMR = .021) than treating them as one single factor (χ2 = 2840.07, *p* < .001; RMSEA = .355; CFI = .598; SRMR = .250). The factor loadings of the different statements appear in Table K-3. In addition, the AVE values for sacrifice mindset and price sensitivity were .99 and .99, respectively, while the correlation between the two factors was r = .31 (*p* < .001). Thus, the square roots of the AVEs (.99 and .99) were significantly larger than the correlation, providing further support for discriminant validity between the two variables.

Table K-3

CFA RESULTS OF SACRIFICE MINDSET AND PRICE SENSITIVITY:
FACTOR LOADINGS AND CORRESPONDING STANDARD ERRORS (SE)

| *Construct* | *Items* | *Loading* | *SE* |
| --- | --- | --- | --- |
| Sacrifice  mindset | I believe sacrifice is a great virtue. | .84 | .015 |
| I am willing to give up my personal benefits for a bigger cause. | .95 | .005 |
| Sacrificing is important and seems easy at the moment. | .89 | .011 |
| I feel the need to give up things I like doing. | .91 | .009 |
| I feel the urge to make the necessary sacrifice. | .94 | .007 |
| Sacrifices are necessary to achieve long-term goals for oneself and for society. | .92 | .009 |
| I am willing to forgo desired activities for something more important. | .90 | .010 |
| Price  sensitivity | If I were going to buy a [product], the probability of buying this [product] at the current price is … | .91 | .010 |
| The likelihood that I would purchase this [product] at the current price is ... | .93 | .008 |
| The probability that I would consider buying this [product] at the current price is ... | .93 | .008 |
| At the current price, the likelihood that I would seriously consider buying this [product] is ... | .95 | .006 |
| The probability that I am willing to buy this [product] at the current price is ... | .92 | .008 |

**Web Appendix L**

*STUDY 4: GYM MEMBERSHIP SCENARIO*

Suppose you have been thinking about becoming a member of a gym, called ExPace (detailed below), nearby your apartment or house for a while. Last week, you went online and found that you have to pay a $99 initiation fee and a **$24.99** per month fee to become a member of this gym. Today, you decided to visit the gym personally to finally become a member. During the visit, you find the monthly fee is now **$29.99**.

**
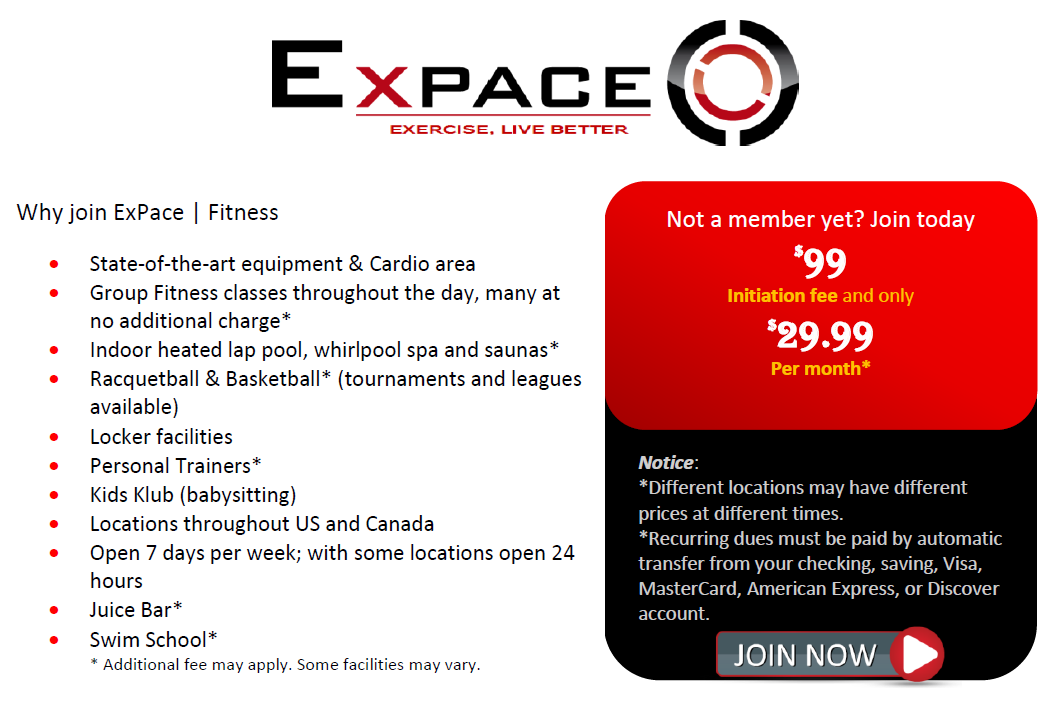
**

**Web Appendix M**

*STUDY 5 PRETEST: THE EFFECTIVENESS OF COGNITIVE VS. AFFECTIVE PROCESSING MODE MANIPULATION*

*Method*

The pretest is a 2 (processing mode: cognitive vs. affective) between-subjects design. Participants were 188 U.S. consumers recruited from MTurk. Their ages ranged from 20 to 87 years (Mage = 36.97 years, SD = 12.37), 99 were female, and 49% reported an annual household income over $50,000.

*Procedure*. Participants first read the shoe purchase scenario, within which they either viewed the cognitive-processing-mode poster or the affective-processing-mode poster. Next, they completed the price-sensitivity measure by indicating their purchase likelihood for a pair of the shoes after the price increase. Then, they completed the sacrifice-mindset measure, manipulation check for the processing modes, and realism check. Lastly, they completed demographic measures, including one question that asked which gender they identified with (four options were available: male, female, both, neither). All the participants chose either male or female as their identified gender.

*Processing mode*. The processing mode manipulation was adopted from Klein and Melnyk (2016). Participants were asked to put themselves into the following context:

You are shopping for a new pair of shoes with your friend. You then find a suitable one from S&C, a famous shoe brand. From the following in-store poster, you learned the price of the pair of shoes is currently $54.95. At the moment, your friend told you that s/he remembers the price of the same pair of shoes was $49.95 last week. After talking to the store clerk, you learned that the prices of some of the S&C shoes have been increased in the last week.

Then, participants in the cognitive-processing mode condition viewed a poster that emphasized the functional appeals of the shoes such as quality, stability, and durability. These attributes require consumers to process them with deliberation. In contrast, those in the affective-processing mode condition viewed a poster that emphasized the emotional appeal of the shoes such as comfort, sophistication, and style (figure M-1). These attributes focus on how consumers would feel by using the products, and thus require less deliberation (Klein and Melnyk 2016).

Figure M-1

MANIPULATION OF COGNITIVE VS. AFFECTIVE PROCESSING

Panel A: Cognitive Processing Poster

Panel B: Affective Processing Poster

*Price sensitivity*. We used a five-item scale adapted from Grewal, Monroe, and Krishnan (1998), which is reported in Appendix J (α = .98). A higher value on the index indicates higher purchase intention for the shoes after price increase, or lower price sensitivity.

*Sacrifice mindset*. We measured sacrifice mindset as the average of seven items from Gao, Zhang, and Mittal (2017; α = .91; see Web Appendix J). Higher values on this index indicate a stronger sacrifice mindset.

*Processing-mode manipulation check*. To check the processing-mode manipulation we asked the participants to complete a two-item scale: “In making the above purchase decision, I relied mostly on my affect/emotion” and “In making the above purchase decision, I did not think too much of the details” (1=strongly disagree, 7=strongly agree). We averaged participants’ scores on the two items to form a manipulation check index (*r* = .64, *p* < .001), with higher value indicating more reliance on affective-processing mode.

*Realism check*. To ensure the realism of the posters, we asked the participants to indicate “I feel the above purchase scenario is realistic,” and “The above purchase scenario looks real to me.” The two items were averaged to form a realism check index (*r* = .78, *p* < .001) with higher value indicating that the purchase scenario was perceived as more realistic by consumers.

*Results*

*Manipulation check*. To check the effectiveness of the processing-mode manipulation we conducted a full-factorial ANOVA on the manipulation check index with processing mode, gender identity, and their interaction as the predictors. We controlled for age (F(1, 177) = 4.37, *p* = .038), income (F<1), and ethnicity (F(5, 177) = 1.62, *p* = .156). Importantly, the effect of processing-mode manipulation was significant (F(1, 177) = 5.79, *p* = .017). Specifically, those in the affective-processing mode condition reported higher reliance on affect and emotion in making their purchase decisions than those in the cognitive-processing mode condition (Maffective = 4.56 vs. Mcognitive = 3.94). Neither the simple main effect of gender nor the interaction effect was significant (Fs < 1). Thus, the manipulation of processing mode was successful.

*Realism check*. To check the perceived realism of the purchase scenario, we conducted a similar full-factorial ANOVA on the realism check index. The results indicated none of the effects was significant (Fs < 2.45, *p*s > .119). Both the affective- and cognitive-processing mode poster look equally realistic to the consumers (Maffective = 5.70 vs. Mcognitive = 5.78). More importantly, in both the affective (5.70 vs. 4; t(98) = 14.90, *p* < .001) and cognitive (5.78 vs. 4; t(88) = 15.96, *p* < .001) conditions, the rated realism indexes were significantly higher than the scale midpoint of 4.

*Price sensitivity*. As we theorize, an affective-processing mode should facilitate a sacrifice mindset and lower price sensitivity. To test this prediction, we conducted a full-factorial ANOVA on the price-sensitivity index with processing mode, gender identity, and their interaction as the predictors. We controlled for age (F(1, 177) = 12.76, *p* < .001), income (F<1), and ethnicity (F(5, 177) = 2.98, *p* = .013) in the model. More importantly, the main effect of processing mode was significant (F(1, 177) = 27.15, *p* < .001), with those in the affective-processing condition reporting higher willingness to buy the shoes after price increase or showing a lower price sensitivity (Maffective = 3.96 vs. Mcognitive = 2.47). No other effects were significant.

*Sacrifice mindset*. We predict that participants under the affective-processing mode would report a stronger sacrifice mindset than those under the cognitive-processing mode. To test the prediction, we conducted a similar full-factorial ANOVA on the sacrifice-mindset index. Among the control variables, only the effect of ethnicity was marginally significant (F(5, 177) = 1.96, *p* = .087). More importantly, the effect of processing mode was significant (F(1, 177) = 10.54, *p* = .001). Specifically, those in the affective-processing mode reported a stronger sacrifice mindset than those in the cognitive-processing mode (Maffective = 5.25 vs. Mcognitive = 4.73).

*Affective-processing mode → sacrifice mindset → lower price sensitivity*. To test this chain of effects, we conducted a mediation analysis using Model 4 of PROCESS (Hayes 2013). Specifically, we defined affective-processing mode as the independent variable, sacrifice mindset as the mediator, and price sensitivity as the outcome variable. At the same time, we included gender, age, income, and ethnicity as control variables. The results indicated that the indirect effect of processing mode on price sensitivity through sacrifice mindset was significant (indirect effect = -.4510, SE = .1490, 95% CI: -.7615 to -.1840).

*Discussion*

This study accomplished several goals. First, it confirmed the processing-mode manipulation was successful. Second, it showed that the purchase scenarios we adopted were realistic and thus reflected real consumer decision context. Third, the tests regarding the effect of processing mode on sacrifice mindset and price sensitivity showed indirect support for our mediation argument and bolstered our overall theorizing.

**Web Appendix N**

*WEB APPENDIX O: SELF-FOCUSED MANIPULATION IN THE HEADPHONES STIMULI (CONTROL CONDITION IN WEB APPENDIX I)*

**Web Appendix O**

*PRETEST FOR THE SELF-FOCUS MANIPULATION*

*Method*

The pretest is a 2 (self-focus: primed vs. control) between-subjects design. Participants were 100 U.S. consumers recruited from MTurk. Their ages ranged from 18 to 82 years (Mage = 35.50 years, SD = 12.07), 41 were female, and 43% reported an annual household income over $50,000.

*Procedure*. Participants were first asked to imagine a scenario for purchasing headphones. Within the scenario, we manipulated self-focus. Next, they completed the price-sensitivity measure. Then, they completed the sacrifice-mindset measure, manipulation check for self-focus, and realism check. Lastly, they provided demographics including gender.

*Self-focus*. Participants in the control condition received the same stimuli used in Study 3 of the main paper (Web Appendix I). Participants in the self-focus condition received similar stimuli emphasizing “enjoy yourself” and many “just for you” benefits (Web Appendix N).

*Price sensitivity*. We used the five-item scale adapted from Grewal, Monroe, and Krishnan (1998; see Web Appendix J; α = .98). The higher value on the index indicates higher purchase intention for the headphones after price increase, or lower price sensitivity.

*Sacrifice mindset*. We measured sacrifice mindset as the average of seven items from Gao, Zhang, and Mittal (2017; α = .88; see Web Appendix J).

*Self-focus manipulation check*. To check the processing-mode manipulation, we asked the participants to complete a two-item scale: “In making the above purchase decision, I mainly focused on …” and “In making the above purchase decision, I tended to focus on …” (1 = “others”, 7 = “myself”). We averaged participants’ scores on the two items to form a manipulation check index (*r* = .86, *p* < .001), with higher value indicating more self-focused in their decision making.

*Realism check*. We asked participants to indicate “I feel the above purchase scenario is realistic,” and “The above purchase scenario looks real to me.” The two items were averaged to form a realism check index (*r* = .70, *p* < .001) with higher value indicating that the purchase scenario was perceived as more realistic by consumers.

*Results*

*Manipulation check*. To check the effectiveness of the self-focus manipulation, we conducted a full-factorial ANOVA on the manipulation check index with self-focus manipulation, gender, and their interaction as the predictors. We included age, income, and ethnicity as control variables. The results indicated that among the control variables, only the effect of ethnicity was significant (F(6, 88) = 2.85, *p* = .014). The simple main effect of self-focus manipulation was significant (F(1, 88) = 15.52, *p* <.001). Specifically, those in the self-focus condition reported more attention being focused on themselves than those in the control condition (Mself-focus = 5.70 vs. Mcontrol = 4.58). Neither the simple main effect of gender nor the interaction effect was significant (Fs < 1). Thus, the manipulation of self-focus was successful.

*Realism check*. To check the perceived realism of the purchase scenario, we conducted a similar full-factorial ANOVA on the realism check index. The results indicated none of the effects was significant (Fs < 2.70, *p*s > .141). Both the self-focus and control-condition headphones stimuli look equally realistic to the consumers (Mself-focus = 5.52 vs. Mcontrol = 5.59). More importantly, in both the self-focus (5.52 vs. 4; t(49) = 9.67, *p* < .001) and control (5.59 vs. 4; t(49) = 9.22, *p* < .001) conditions, the rated realism indexes were significantly higher than the scale midpoint of 4.

*Price sensitivity*. According to our theorizing, those under the self-focus condition are less likely to be in a sacrifice mindset, thus exhibiting higher price sensitivity. To test this prediction, we conducted a full-factorial ANOVA on the price-sensitivity index with self-focus, gender identity, and their interaction as the predictors. At the same time, we controlled for age, income, and ethnicity (Fs<1). The results indicated the main effect of gender was significant (F(1, 88) = 4.24, *p* = .046). Importantly, the main effect of self-focus was significant (F(1, 88) = 4.38, *p* = .039), with those in the self-focus condition reporting lower willingness to buy the headphones after price increase or showing a higher price sensitivity (Mself-focus = 3.95 vs. Mcontrol = 4.69). No other effects in the model was significant. Thus, self-focus increases consumers’ price sensitivity.

*Sacrifice mindset*. According to our theorizing, those under the self-focus condition are less likely to be in a sacrifice mindset. Accordingly, we predict that participants under the self-focus condition would report a weaker sacrifice mindset than those under the control mode. To test the prediction, we conducted a similar full-factorial ANOVA on the sacrifice-mindset index. Age (F<1), income (F(1, 88) = 6.25, *p* = .014), and ethnicity (F(6, 88) = 3.24, *p* = .006) were included as covariates. More importantly, the effect of self-focus was significant (F(1, 88) = 6.30, *p* = .014). Specifically, those in the self-focus condition reported a significantly weaker sacrifice mindset than those in the control condition (Mself-focus = 4.09 vs. Mcontrol = 5.07).

*Discussion*

This study confirmed that the self-focus manipulation was successful and showed the realism of the purchase scenarios. Third, the tests regarding the effect of self-focus on sacrifice mindset and price sensitivity showed indirect support for our mediation argument.

**Web Appendix P**

*SELF-FOCUS AS A BOUNDARY CONDITION*

We test another theoretically important and managerially relevant boundary condition. According to our theoretical framework, consumers are less price sensitive when they are in a sacrifice mindset. Thus, manipulating a construct that focuses consumers’ attention on the self should “turn off” the effect predicted in H1. We posit that self-focus is such a construct (Mehta, Zhu, and Meyers-Levy 2014). Self-focus is the degree to which an individual is concerned with his or her own interests over others’ interests or pays more attention to one’s own needs than to the needs of others. This construct has been extensively used in previous marketing studies (Han, Lalwani, and Duhachek 2017; Zhang, Feick, and Mittal 2014).

Theoretically, an increased self-focus should direct consumers’ attention to themselves, thus diminishing their willingness to sacrifice. Zhang, Feick, and Mittal (2014) find that consumers who are self-focused are less likely to consider the needs of others when deciding whether to spread negative word of mouth. Mehta, Zhu, and Meyers-Levy (2014) find that self-focused consumers are more likely to indulge in impulsive behavior because of the higher weight placed on their immediate needs. As such, self-focus among consumers should weaken a sacrifice mindset and attenuate the interactive effect of gender and local–global identity on price sensitivity. In contrast, in the control condition (i.e., not self-focused), we should replicate the interactive effect predicted in H1 because the sacrifice mindset is free to vary according to the level of congruence between a person’s local–global identity and gender identity.

*Method*

This study used a 2 (self-focus: activated vs. control) × 2 (local–global identity: local vs. global) × 2 (gender: male vs. female) between-subjects design. Participants were 570 U.S. consumers recruited from MTurk in exchange for a cash incentive. Their average age was 36.18 years (SD = 11.13), 264 were females, and 48% had an annual income above $50,000.

*Procedure*. Participants completed a local–global identity manipulation task. Then, after a short filler task, they completed the self-focus manipulation within a purchase scenario and reported the dependent measure of price sensitivity. Finally, they finished the manipulation check and provided demographics, including gender.

*Local*–*global identity manipulation*. We used the local–global identity manipulation (see Web Appendix H) and the manipulation check (α = .96) from Study 3.

*Self-focus manipulation*. To enhance the realism of this study, we manipulated self-focus within the screenshot describing the key product. Participants in the control condition received the same headphones purchase scenario used in Study 2 (see Web Appendix I). In contrast, participants in the self-focus activated condition received a slightly modified version of the stimulus (see Web Appendix N), emphasizing that the purchase was for themselves (e.g., Buying Headphones for YOURSELF) and that all the benefits were designed for them (e.g., Just for YOU Highlights). This was intended to increase their self-focus.

*Manipulation check pretest*. We conducted a pretest with 100 participants from the same sampling frame. The results indicated that the self-focus manipulation was successful, that self-focus induces stronger sacrifice mindset and lower price sensitivity (see Web Appendix O for details).

*Price sensitivity*. We measured price sensitivity with the five-item scale in Web Appendix J (α = .97), with higher values indicating lower price sensitivity.

*Results*

*Manipulation check for local*–*global identity*. A full-factorial ANOVA on the local–global manipulation check index indicated that the main effect of local–global identity was significant (Mlocal = 4.42 vs. Mglobal = 3.77; F(1, 554) = 122.94, *p* < .001; d = .93), with all other variables and interactions being nonsignificant. Thus, the manipulation was successful. Among the control variables, only the effect of age was significant (F(1, 554) = 7.09, *p* = .008).

*Hypothesis testing*. We predict that the interactive effect of gender and local–global identity on price sensitivity should manifest in the control condition in which self-focus is free to vary but should be attenuated in the high self-focus condition. To test this prediction, we conducted a full-factorial ANOVA on the price-sensitivity index, with gender, local–global identity, self-focus, and all their two- and three-way interactions as the independent variables. Age (F<1), income (F(1, 554) = 1.25, *p* = .265), and ethnicity (F<1) were included as covariates. There was a main effect of self-focus (F(1, 554) = 5.17, *p* = .023). Among the two-way interaction effects, only the interaction of gender and local–global identity was significant (F(1, 554) = 5.45, *p* = .019). More importantly, the three-way interaction of local–global identity, gender, and self-focus was statistically significant (F(1, 554) = 10.14, *p* = .002).

Follow-up analyses showed that in the control condition, the two-way interaction effect of gender and local–global identity was significant (F(3, 554) = 6.18, *p* < .001). Females with a global identity reported lower price sensitivity than females with a local identity (Mlocal = 4.02 vs. Mglobal = 4.61; F(1, 554) = 3.43, *p* = .058; d = .19), and males with a local identity reported lower price sensitivity than males with a global identity (Mlocal = 5.08 vs. Mglobal = 3.97; F(1, 554) = 14.50, *p* < .001; d = .35). Thus, the results in the control (i.e., lower self-focus) condition replicate the findings from previous studies. In contrast, high self-focus attenuates the interaction effect between gender and local–global identity to nonsignificance (F < 1). These results appear in Figure P-1 and fully support our theorizing.

Figure P-1

THE MODERATING ROLE OF SELF-FOCUS


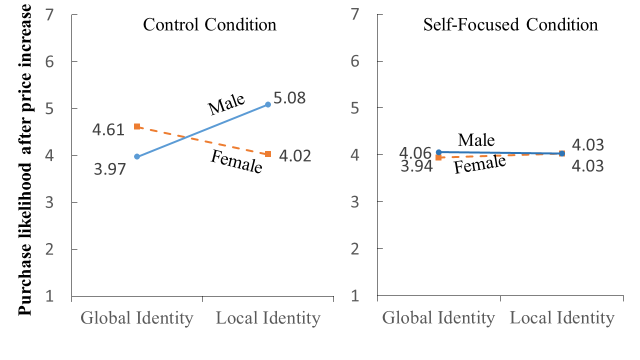


*Discussion*

Using the moderation-of-process approach, this study further supports the sacrifice-mindset explanation for the interactive effect of gender and local–global identity on price sensitivity. Specifically, female consumers with an accessible global (vs. local) identity and male consumers with an accessible local (vs. global) identity show lower price sensitivity only when they are not self-focused, which is a key factor that facilitates the sacrifice mindset. In contrast, for consumers in the high-self-focus condition, the sacrifice mindset is attenuated and as a result, the interactive effect of gender and local–global identity on price sensitivity is mitigated.

**Web Appendix Q**

*THE MODERATING ROLE OF SOCIAL CLASS*

In this additional study, we examine yet another theoretically relevant boundary condition: social class. We argue that an important implication of social class is the level of sacrifice consumers are willing to make. Prior research shows that individuals associated with a high social class are more willing to sacrifice their personal well-being and their time to achieve better life outcomes (Sewell and Shah 1968). Consumers from a high social class are more likely to sacrifice present benefits to pursue better future gains (Doepke and Zilibotti 2005). In addition, compared with those from a low social class, individuals from a high social class tend to show a better understanding of the need for making financial sacrifices to gain better outcomes (Henry 2005). Rodman and Voydanoff (1978) find that individuals from a low social class are more reluctant to make sacrifices for better future outcomes. Accordingly, we predict that the interactive effect of gender and local–global identity on price sensitivity should be present among high-social-class consumers, whose sacrifice mindset can vary according to gender or local–global identity. In contrast, because low-social-class consumers are less willing to make sacrifices, their sacrifice mindset tends to be weaker and does not vary much. As a result, the interactive effect should be attenuated.

*Method*

This study was a 2 (gender: male vs. female, measured as biological sex) × 2 (social class: high vs. low, manipulated) × continuous (local–global identity: measured) mixed design. We manipulated social class and measured gender and local–global identity. We recruited 476 U.S. consumers from MTurk. Their average age was 34.36 years, 201 were women, and 45% had an annual income above $50,000.

*Procedure*. Participants were randomly assigned to the social-class manipulation (which we describe next). Then, they completed the measure of price sensitivity and local–global identity. We counterbalanced the order of these two measures, and order was not significant (F < 1). Finally, participants provided demographic information, including gender.

*Social class*. We adapted this manipulation from the work of Kraus and Keltner (2013; see Figure Q-1). Participants saw an image of a ladder with ten rungs and were told to think of the ladder as a representation of where people stand in the social hierarchy. Then, participants in the high- (low-) social-class condition compared themselves to the people at the very bottom (top) of the ladder. They were also informed that those with the least (most) money, least (most) education, and least (most) respected jobs are the worst (best) off. Then participants imagined interacting with people at the very bottom (top) and were asked to think about how their differences might affect the conversation topic, the interaction, and what they might say to each other. Finally, they wrote down their thoughts in approximately five sentences.

*Local–global identity scale*. We measured local–global identity with an eight-item scale from Tu, Khare, and Zhang (2012; 1 = “strongly disagree,” 7 = “strongly agree”; see Web Appendix J). The average of the eight items formed a local-identity index (α = .76), with higher values indicating a stronger local identity or a weaker global identity.

*Price sensitivity*. Participants were first exposed to the same stimuli used in Study 4 (Web Appendix J) regarding joining a gym after a price increase. Then, we measured price sensitivity with the same five-item scale used in Study 2 (α = .97; see Web Appendix J) with higher values indicating a higher intention to join the gym after the price increase (or lower price sensitivity).

Figure Q-1

SUPPLEMENT: SOCIAL-CLASS MANIPULATION

**
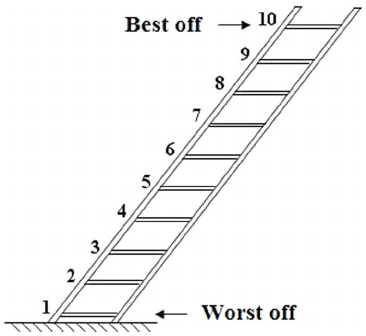
**

Please think of the ladder above as representing where people stand in the United States. Specifically, people at the very bottom rung (numbered 1) are those with the lowest social economic status, people at the very top rung (numbered 10) are those with the highest social economic status, and people between (numbered 2–9) are those whose social economic status are between the two.

Now please compare yourself to the people at the **very bottom (very top)** of the ladder. These are people who are the **worst off** **(best off)—**those who have the **least (most)** money, the **least (most)** education, and the **least (most)** respected jobs. In particular, we’d like you to think about how you are **different from** these people in terms of your own income, educational history, and job status.

Now please imagine yourself getting acquainted with one of the people you just thought about from the ladder above, those who stand at the **very bottom (very top)** of the social-economic status ladder. Based on this, please think about how the differences between the two of you might affect what you would talk about, how the interaction is likely to go, and what you and the other person might say to each other. Please write down those thoughts in no more than five sentences.

*Results*

To test the moderating role of social class, we conducted a regression analysis. Local identity, gender, social class, and all their two- and three-way interactions were the independent variables with the price-sensitivity measure as the dependent variable. We included age, income, and ethnicity as control variables. As Table Q-1 shows, among the control variables, the main effect of age was positive and significant (b = .02, SE = .01, t(465) = 2.22, *p* = .027)), while the main effect of ethnicity was negative and significant (b = -.16, SE = .06, t(465) = -2.61, *p* = .009). No other main effect was significant. Among the two-way interaction effects, the interaction between gender and social class (b = –3.91, SE = 1.48, t(465) = –2.67, *p* = .008) was significant. More importantly, the three-way interaction among local identity, gender, and social class was significant (b = .83, SE = .35, t(465) = 2.39, *p* = .017).

Table Q-1

REGRESSION RESULTS ON THE MODERATING ROLE OF SOCIAL CLASS

| *Variables* | *Coefficients (SE)* |
| --- | --- |
| Intercept | 4.06*** (.86) |
| Income | .08 n.s. (.05) |
| Age | .80* (.01) |
| Ethnicity | -.16** (.06) |
| Local identity | -.03n.s. (.20) |
| Gender | .42n.s. (1.05) |
| Social class | 1.88n.s. (1.23) |
| Local identity × gender | -.04n.s. (.26) |
| Local identity × social class | –.34n.s. (.27) |
| Gender × social class | –3.91* (1.47) |
| Local identity × gender × social class | .83* (.35) |
| Adjusted R-square | .0497 |

**p* < .05.

***p* < .01.

****p* < .001.

Notes: n.s. = indicates not significant, or *p* > .05.

To examine the patterns embedded in the three-way interaction, we conducted further analyses with the PROCESS Model 3 (Hayes 2013). Specifically, for consumers who perceive themselves as being in a high social class, the interaction effect of local identity and gender was statistically significant (b = -.78, SE= .24, t(465) = -3.30, *p* = .001; d = .48). Among females, as their local identity became stronger, their price sensitivity increased (b= –.34, SE = .16, t(465) = –2.02, *p* = .047; d = .21); among males, as their local identity became stronger, their price sensitivity decreased (b = .43, SE = .15,t(465) = 2.87, *p* = .004; d = .29). These results are consistent with H1—namely, females with a strong global identity and males with a strong local identity have lower price sensitivities than they would have otherwise. In contrast, for consumers who perceive themselves as being in a lower social class, the two-way interaction effect between local identity and gender was statistically nonsignificant (b = .10, SE = .25, t(465) = .40, *p* > .396). Thus, the interaction in H1 manifests for those in a high social class but not for those in a low social class. These results appear in Figure Q-2 and support our theorizing.

Figure Q-2

THE BOUNDARY CONDITION OF SOCIAL CLASS
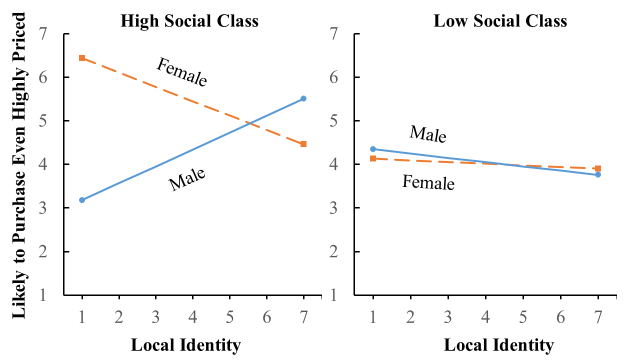


*Discussion*

This additional study shows how the interactive effect of gender and local–global identity on price sensitivity manifests among consumers who view themselves as being in a high social class; this is consistent with our theorizing that high social class is associated with a greater willingness and readiness to make a sacrifice, thus facilitating a sacrifice mindset. The interactive effect on price sensitivity is attenuated among those from a low social class. As we theorize, a lower social class should be associated with a sacrifice mindset to a lower extent. Finally, such an effect does not manifest among those experiencing identity congruence.

**Web Appendix R**

*THE COMPARISON BETWEEN FEMALE AND MALE CONSUMERS BASED ON THEIR ACCESSIBLE LOCAL–GLOBAL IDENTITY*

| *Study* | *Time Period* | *Moderator* | *Identity Condition* | *Female* | *Male* | *t-Test Results* |
| --- | --- | --- | --- | --- | --- | --- |
| 1 |  |  | Local | –.11 (.07) | .32 (.07) | t = 5.99, *p* < .001 |
| Global | .12 (.07) | –.32 (.06) | t = 4.80, *p* < .001 |
| 2 | Baseline | Pumpkin cake | Local | 11.22% | 14.23% | χ2 = 2.20, *p* = .137 |
| Price-Increased | 6.63% | 12.98% |
| Baseline | Global | 11.38% | 14.39% | χ2 = 3.97, *p* = .046 |
| Price-Increased | 10.40% | 6.99% |
| Baseline | Chives | Local | 14.97% | 18.25% | χ2 = 3.09, *p* = .078 |
| Price-Increased | 9.25% | 17.89% |
| Baseline | Global | 14.96% | 17.05% | χ2 = 2.67, *p* = .102 |
| Price-Increased | 14.77% | 10.84% |
| Baseline | Cabbage | Local | 21.65% | 15.69% | χ2 = 1.62, *p* = .203 |
| Price-Increased | 16.40% | 15.44% |
| Baseline | Global | 20.36% | 16.67% | χ2 = 5.31, *p* = .021 |
| Price-Increased | 19.97% | 8.74% |
| Baseline | Cilantro | Local | 12.99% | 12.77% | χ2 = 1.10, *p* = .295 |
| Price-Increased | 9.77% | 12.98% |
| Baseline | Global | 13.97% | 12.88% | χ2 = 4.37, *p* = .036 |
| Price-Increased | 13.76% | 6.29% |
| Baseline | Lotus root | Local | 14.37% | 13.87% | χ2 = 2.06, *p* = .151 |
| Price-Increased | 9.42% | 13.68% |
| Baseline | Global | 15.57% | 12.50% | χ2 = 3.05, *p* = .081 |
| Price-Increased | 14.43% | 6.64% |
| Baseline | Needle mushroom | Local | 11.61% | 8.03% | χ2 = 2.26, *p* = .132 |
| Price-Increased | 7.16% | 8.07% |
| Baseline | Global | 13.37% | 10.61% | χ2 = 4.07, *p* = .043 |
| Price-Increased | 13.42% | 5.24% |
| Baseline | Seaweed | Local | 15.35% | 15.33% | χ2 = .08, *p* = .774 |
| Price-Increased | 15.71% | 17.19% |
| Baseline | Global | 17.56% | 16.67% | χ2 = 1.07, *p* = .302 |
| Price-Increased | 18.46% | 13.64% |
| 3 |  |  | Local | 4.12 (1.53) | 4.73 (1.47) | t = –2.24, *p* = .026 |
|  |  | Global | 4.66 (1.67) | 4.07 (1.81) | t = 2.31, *p* = .021 |
| 4 |  | Control | Local | 3.64 (2.06) | 4.45 (1.47) | t = –2.69, *p* = .003 |
| Global | 4.26 (1.65) | 3.44 (1.70) | t = 2.85, *p* = .004 |
| Depleted | Local | 4.50 (1.89) | 4.43 (1.46) | t = .98, *p* = .323 |
| Global | 4.07 (1.95) | 4.35 (1.61) | t = .26, *p* = .788 |
| 5 |  | Cognitive | Local | 3.56 (1.89) | 4.26 (1.04) | t = –1.81, *p* = .072 |
| Global | 4.15 (1.86) | 3.49 (1.45) | t = 2.43, *p* = .019 |
| Affective | Local | 4.35 (1.86) | 4.29 (1.45) | t =.56, *p* = .532 |
| Global | 4.21 (1.69) | 4.24 (1.41) | t = –.37, *p* = .712 |

**Web Appendix S**

*REPLICATING THE IDENTITY-INCONGRUENCE EFFECT WITH A SIMPLER WAY OF MANIPULATING LOCAL–GLOBAL IDENTITY*

*Method*

In this study, we intend to manipulate local–global identity in a way that might be easier for companies to adopt in practice. This was a 2 (local–global identity: local vs. global) × 2 (gender: female vs. male) between-subjects design. The participants were 188 U.S. consumers recruited from MTurk. Their age ranged from 20 to 65 (Mage = 31.43 years, SD = 9.15), 82 of them were female, 53% reported annual household income above $50,000.

*Procedure*. The participants were randomly assigned to one of the experimental conditions. They first encountered a purchase scenario for a pair of headphones, where the price of the headphones was increased. We also manipulated local–global identity within the scenario. Next, participants indicated their price sensitivity. Then we measured manipulation check of local–global identity and gender identity. Lastly, we collected demographics, including gender, age, income, and ethnicity.

*Local–global identity*. In the local-identity condition, participants read the following description under the brand name: “We serve LOCAL consumers like yourself, who support the local community, pay attention to local news, and dedicate to preserve local traditions/cultures.” In contrast, in the global-identity condition, participants read: “We serve GLOBAL consumers like yourself, who support globalization, pay attention to global news, and care to learn about different cultures/customs” (see figure S-1 for details).

*Price sensitivity*. We measured price sensitivity with the same 5-item scale from Study 3 (α = .95). Higher values on this index indicates higher likelihood to buy the headphones even after the price increase, i.e., lower price sensitivity.

Figure S-1

MANIPULATING LOCAL–GLOBAL IDENTITY WITHIN PURCHASE SCENARIOS

*Panel A: Local-Identity Condition*

*Panel B: Global-Identity Condition*

*Gender identity*. We measured gender identity by asking the participants to indicate the gender with which they identify: male, female, both, neither, others (please specify). All the participants chose either male or female.

*Results*

*Manipulation check*. We used the same three-item scale from Study 3 of the main text, which asked participants to indicate to what extent they identified as a local vs. global citizen. We averaged the three items to form a manipulation check index (α = .94), with higher values indicating stronger local identity. Then, we conducted a full-factorial ANOVA on the manipulation check index with gender, local–global identity, and their interaction as predictors. We also controlled for age, income, and ethnicity. The results indicated that among the control variables, the effects of income (F(1, 178) = 6.57, *p* = .011) and ethnicity (F(4, 178) = 8.89, *p* < .001) were both significant, whereas the effect of age was not significant (F<1). Neither the effect of gender identity (F<1) nor the interaction effect of gender identity and local–global identity (F(1, 178) = 1.76, *p* = .187) was significant. More importantly, the effect of local–global identity was significant (F(1, 178) = 4.22, *p* = .041), with those under the local-identity condition reporting stronger identification as local citizens (Mlocal = 3.43 vs. Mglobal = 2.89). Thus, the local–global identity manipulation was successful.

*Hypothesis testing*. To test the identity incongruence effect on price sensitivity, we conducted a full-factorial ANOVA on the price sensitivity index with gender identity, local–global identity, and their interaction as predictors. We also controlled for age, income, and ethnicity. Among the control variables, only the effect of ethnicity was significant (F(4, 178) = 3.96, *p* = .004). Neither the main effect of gender identity nor the effect of local–global identity was significant (Fs<1). However, their interaction effect was significant (F(1, 178) = 10.34, *p* = .002). Follow-up analyses indicated that under female gender identity, those with a salient global identity showed lower price sensitivity or higher purchase intention for the headphones after price increase (Mlocal = 4.53 vs. Mglobal = 5.19; F(1, 178) = 4.39, *p* = .038). In contrast, under male gender identity, those with a salient local identity showed lower price sensitivity or higher purchase intention (Mlocal = 5.22 vs. Mglobal = 4.43; F(1, 178) = 6.11, *p* = .014). Thus, the results support our hypothesis (Figure S-2).

Figure S-2

WEB APPENDIX S: IDENTITY INCONGRUENCE EFFECT ON PRICE SENSITIVITY


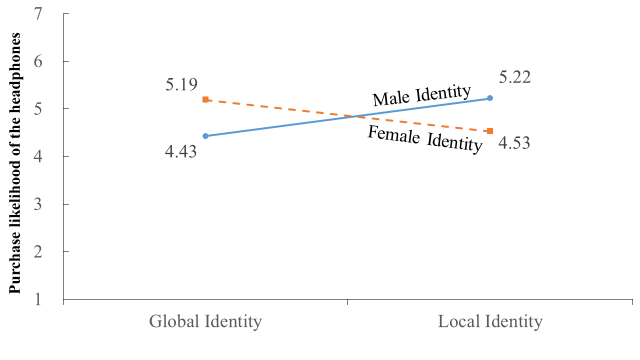


*Discussion*

This study not only provides further support for our proposed identity-incongruence effect on price sensitivity, but also has important managerial implications. Specifically, the new local–global identity manipulation used in this study is shorter and easier for companies to incorporate in their advertisements, product/brand descriptions, social-media promotions, etc.

**WEB APPENDIX REFERENCES**

Arnett, Jeffrey J. (2002), “The Psychology of Globalization,” *American Psychologist*, 57 (10), 774–83.

Bem, Sabdra L. (1974), “The Measurement of Psychological Androgyny,” *Journal of Consulting and Clinical Psychology*, 42 (2), 155–62.

Bijmolt, Tammo H. A., Harald J. van Heerde, and Rik G. M. Pieters (2005), “New Empirical Generalizations on the Determinants of Price Elasticity,” *Journal of Marketing Research*, 42 (May), 141–56.

Campbell, Margaret C. (1999), “Perceptions of Price Unfairness: Antecedents and Consequences,” *Journal of Marketing Research*, 36 (May), 187–99.

Campbell, Margaret C. (2007), “‘Says Who?!’ How the Source of Price Information and Affect Influence Perceived Price (Un)Fairness,” *Journal of Marketing Research*, 44 (May), 261–71.

Chen, Haipeng (Allan), Daniel Levy, Sourav Ray, and Mark Bergen (2008), “Asymmetric Price Adjustment in the Small,” *Journal of Monetary Economics*, 55 (4), 728–37.

Chen, Haipeng (Allan), Howard Marmorstein, Michael Tsiros, and Akshay R. Rao (2012), “When More Is Less: The Impact of Base Value Neglect on Consumer Preferences for Bonus Packs over Price Discounts,” *Journal of Marketing*, 76 (July), 64–77.

Dahl, Darren W., Jaideep Sengupta, and Kathleen D. Vohs (2009), “Sex in Advertising: Gender Differences and the Role of Relationship Commitment,” *Journal of Consumer Research*, 36 (2), 215–31.

Dodds, William B., Kent B. Monroe, and Dhruv Grewal (1991), “Effects of Price, Brand, and Store Information on Buyers’ Product Evaluations,” *Journal of Marketing Research*, 28 (August), 307–19.

Doepke, Matthias and Fabrizio Zilibotti (2005), “Social Class and the Spirit of Capitalism,” *Journal of the European Economic Association*, 3 (2/3), 516–24.

Eagly, Alice H. (2009), “The His and Hers of Prosocial Behavior: An Examination of the Social Psychology of Gender,” *American Psychologist*, 64 (8), 644–58.

Fornell, Claes and David F. Larcker (1981), “Evaluating Structural Equation Models with Unobserveable Variables and Measurement Error,” *Journal of Marketing Research*, 18 (February), 39–50.

Gabriel, Shira and Wendi L. Gardner (1999), “Are There ‘His’ and ‘Hers’ Types of Interdependence? The Implications of Gender Differences in Collective Versus Relational Interdependence for Affect, Behavior, and Cognition,” *Journal of Personality and Social Psychology*, 77 (September), 642–55.

Gao, Huachao, Yinlong Zhang, and Vikas Mittal (2017), “How Does Local–Global Identity Affect Price Sensitivity,” *Journal of Marketing*, 81 (May), 62–79.

Grewal, Dhruv, Kent B. Monroe, and R. Krishnan (1998), “The Effects of Price-Comparison Advertising on Buyers’ Perceptions of Acquisition Value, Transaction Value, and Behavioral Intentions,” *Journal of Marketing*, 62 (April), 46–59.

Han, Dahee, Ashok K. Lalwani, and Adam Duhachek (2017), “Power Distance Belief, Power, and Charitable Giving,” *Journal of Consumer Research*, 44 (1), 182–95.

Hayes, Andrew F. (2013), *Introduction to Mediation, Moderation, and Conditional Process Analysis: A Regression-Based Approach.* New York: Guilford Press.

He, Xin, J. Jeffrey Inman, and Vikas Mittal (2008), “Gender Jeopardy in Financial Risk Taking,” *Journal of Marketing Research*, 45 (August), 414–24.

Henry, Paul C. (2005), “Social Class, Market Situation, and Consumers’ Metaphors of (Dis)Empowerment,” *Journal of Consumer Research*, 31 (4), 766–78.

Hirsh, Jacob B. and Sonia K. Kang (2016), “Mechanisms of Identity Incongruence: Uncertainty, Anxiety, and the Behavioral Inhibition System,” *Personality and Social Psychology Review*, 20 (3), 223–44.

Huber, Joel, Morris B. Holbrook, and Barbara Kahn (1986), “Effects of Competitive Context and of Additional Information on Price Sensitivity,” *Journal of Marketing Research*, 23 (August), 250–60.

Klein, Kristina and Valentyna Melnyk (2016), “Speaking to the Mind or the Heart: Effects of Matching Hedonic versus Utilitarian Arguments and Products,” *Marketing Letters*, 27 (1), 131–42.

Kraus, Michael W. and Dacher Keltner (2013), “Social Class Rank, Essentialism, and Punitive Judgment,” *Journal of Personality and Social Psychology*, 105 (2), 247–61.

Mehta, Ravi, Rui (Juliet) Zhu, and Joan Meyers-Levy (2014), “When Does a Higher Construal Level Increase or Decrease Indulgence? Resolving the Myopia Versus Hyperopia Puzzle,” *Journal of Consumer Research*, 41 (2), 475–88.

Melnyk, Valentyna, Stijn M. J. van Osselaer, and Tammo H. A. Bijmolt (2009), “Are Women More Loyal Customers Than Men? Gender Differences in Loyalty to Firms and Individual Service Providers,” *Journal of Marketing*, 73 (July), 86–92.

Meyers-Levy, Joan and Barbara Loken (2015), “Revisiting Gender Differences: What We Know and What Lies Ahead,” *Journal of Consumer Psychology*, 25 (1), 29–49.

Rabinovich, Anna and Thomas A. Morton (2016), “Coping with Identity Incongruence: Perceptions of Self as Flexible Versus Fixed Moderate the Effect of Identity Incongruence on Well-Being,” *Self and Identity*, 15 (2), 224–44.

Reed, Americus, II, Mark R. Forehand, Stefano Puntoni, and Luk Warlop (2012), “Identity-Based Consumer Behavior,” *International Journal of Research in Marketing*, 29 (4), 310–21.

Rodman, Hayman and Patricia Voydanoff (1978), “Social Class and Parents’ Range of Aspirations for Their Children,” *Social Problems*, 25 (3), 333–44.

Saint Clair, Julian and Mark Forehand (2012), “When Do Consumers Prefer Mistargeted Products? The Effect of Structure and Competition on Preference for Identity (In)Consistency,” in *Advances in Consumer Research*, Vol. 40, Zeynep Gürhan-Canli, Cele Otnes, and Rui (Juliet) Zhu, eds. Duluth, MN: Association for Consumer Research, 288–92.

Sewell, William H. and Wimal P. Shah (1968), “Social Class, Parental Encouragement, and Educational Aspirations,” *American Journal of Sociology*, 73 (5), 559–72.

Tu, Lingjiang, Adwait Khare, and Yinlong Zhang (2012), “A Short 8-Item Scale for Measuring Consumers’ Local-Global Identity,” *International Journal of Research in Marketing*, 29 (1), 35–42.

Umashankar, Nita, Yashoda Bhagwat, and V. Kumar (2017), “Do Loyal Customers Really Pay More for Services,” *Journal of the Academy of Marketing Science*, 45 (6), 807–26.

Wakefield, Kirk L. and Jeffrey Inman (2003), “Situational Price Sensitivity: The Role of Consumption Occasion, Social Context and Income,” *Journal of Retailing*, 79 (4), 199–212.

Wang, Jing and Catherine A. Cole (2015), “The Effects of Age and Expertise on Product Evaluations: Does the Type of Information Matter?” *Management Science*, 62 (7), 2039–53.

Winterich, Karen Page, Vikas Mittal, and William T. Ross Jr. (2009), “Donation Behavior Toward In-Groups and Out-Groups: The Role of Gender and Moral Identity,” *Journal of Consumer Research*, 36 (2), 199–214.

Zhang, Yinlong, Lawrence Feick, and Vikas Mittal (2014), “How Males and Females Differ in Their Likelihood of Transmitting Negative Word of Mouth,” *Journal of Consumer Research*, 40 (April), 1097–1108.

Zhang, Yinlong and Adwait Khare (2009), “The Impact of Accessible Identities on the Evaluation of Global Versus Local Products,” *Journal of Consumer Research*, 36 (3), 524–37.

1. Notably, we obtained the effects when we excluded the control variables from the model. [↑](#footnote-ref-1)
